# Supplementary material
Source: publisher figshare collection journal article supplement (https://acs.figshare.com/ndownloader/files/5766741)
Supplement: Supplementary file 1 [file 5766741]

# ja9928780.cif

# Manuscript Number JA9928780-187

# 1. SUBMISSION DETAILS

data_global

_publ_contact_author
;
   Prof. Dr. H. Schmidbaur
   Anorganisch-chemisches Institut
   der Technischen Universit\"at M\"unchen
   Lichtenbergstra\"se 4
   D-85747 Garching
   Germany
;

_publ_contact_author_phone   '++49 89 2891-3130'
_publ_contact_author_fax     '++49 89 2891-3125'
_publ_contact_author_email   'H.Schmidbaur@lrz.tum.de'
_publ_requested_journal      'J. Am. Chem. Soc.'
_publ_requested_coeditor_name ?

_publ_contact_letter
;
   please consider this CIF submission for publication in "J. Am. Chem. Soc.".
   Date of submission: 07-26-99.
;

#============================================================================

# 2. PROCESSING SUMMARY (IUCr Office Use Only)

_journal_date_recd_electronic     ?

_journal_date_to_coeditor         ?
_journal_date_from_coeditor       ?
_journal_date_accepted            ?

_journal_date_printers_first      ?
_journal_date_printers_final      ?
_journal_date_proofs_out          ?
_journal_date_proofs_in           ?

_journal_coeditor_name            ?
_journal_coeditor_code            ?
_journal_coeditor_notes
 ?

_journal_techeditor_code          ?
_journal_techeditor_notes
 ?

_journal_coden_ASTM               ?
_journal_name_full                ?
_journal_year                     ?
_journal_volume                   ?
_journal_issue                    ?
_journal_page_first               ?
_journal_page_last                ?

_journal_suppl_publ_number        ?
_journal_suppl_publ_pages         ?

#============================================================================

# 3. TITLE AND AUTHOR LIST

_publ_section_title
;
 A Carbene-Analogue with Low-Valent Gallium as a 
 Heteroatom in a Quasi-Aromatic Imidazolate Anion
;

_loop
_publ_author_name
_publ_author_address
   'E. S. Schmidt'
;    Anorganisch-chemisches Institut
    der Technischen Universit\"at M\"unchen
    Lichtenbergstra\"se 4
    D-85747 Garching
    Germany
;
   'A. Jockisch'
;    Anorganisch-chemisches Institut
    der Technischen Universit\"at M\"unchen
    Lichtenbergstra\"se 4
    D-85747 Garching
    Germany
;

#==============================================================================

# 4. TEXT

_publ_section_abstract
;
 ?
;

_publ_section_comment
;
 ?
;

_publ_section_experimental
;
 ?
;

_publ_section_references
;
Sheldrick, G.M. (1997)
Program SHELXL-97, University of G\"ottingen.

Sheldrick, G.M. (1997)
Program SHELXS-97, University of G\"ottingen.

Bruker AXS, Inc. (1998)
SHELXTL (TM).
;
_publ_section_figure_captions
;
 ?
;
_publ_section_acknowledgements
;
 ?
;
#==============================================================================
 
 
data_compound_1 
 
_audit_creation_method            SHELXL-97 
_chemical_name_systematic 
; 
 ? 
; 
_chemical_name_common             ? 
_chemical_melting_point           ? 
_chemical_formula_moiety          ? 
_chemical_formula_sum 
 'C20 H40 Cl2 Ga2 N4' 
_chemical_formula_weight          546.90 
 
loop_ 
 _atom_type_symbol 
 _atom_type_description 
 _atom_type_scat_dispersion_real 
 _atom_type_scat_dispersion_imag 
 _atom_type_scat_source 
 'C'  'C'   0.0033   0.0016 
 'International Tables Vol C Tables 4.2.6.8 and 6.1.1.4' 
 'H'  'H'   0.0000   0.0000 
 'International Tables Vol C Tables 4.2.6.8 and 6.1.1.4' 
 'N'  'N'   0.0061   0.0033 
 'International Tables Vol C Tables 4.2.6.8 and 6.1.1.4' 
 'Cl'  'Cl'   0.1484   0.1585 
 'International Tables Vol C Tables 4.2.6.8 and 6.1.1.4' 
 'Ga'  'Ga'   0.2307   1.6083 
 'International Tables Vol C Tables 4.2.6.8 and 6.1.1.4' 
 
_symmetry_cell_setting            monoclinic 
_symmetry_space_group_name_H-M    C2/c 
 
loop_ 
 _symmetry_equiv_pos_as_xyz 
 'x, y, z' 
 '-x, y, -z+1/2' 
 'x+1/2, y+1/2, z' 
 '-x+1/2, y+1/2, -z+1/2' 
 '-x, -y, -z' 
 'x, -y, z-1/2' 
 '-x+1/2, -y+1/2, -z' 
 'x+1/2, -y+1/2, z-1/2' 
 
_cell_length_a                    61.445(13) 
_cell_length_b                    10.4410(10) 
_cell_length_c                    29.371(10) 
_cell_angle_alpha                 90.00 
_cell_angle_beta                  101.450(10) 
_cell_angle_gamma                 90.00 
_cell_volume                      18468(8) 
_cell_formula_units_Z             28 
_cell_measurement_temperature     193(2) 
_cell_measurement_reflns_used     25 
_cell_measurement_theta_min       13 
_cell_measurement_theta_max       16 
 
_exptl_crystal_description        transparent block 
_exptl_crystal_colour             yellow 
_exptl_crystal_size_max           0.5 
_exptl_crystal_size_mid           0.35 
_exptl_crystal_size_min           0.25 
_exptl_crystal_density_meas       ? 
_exptl_crystal_density_diffrn     1.377 
_exptl_crystal_density_method     'not measured' 
_exptl_crystal_F_000              7952 
_exptl_absorpt_coefficient_mu     2.257 
_exptl_absorpt_correction_type    empirical 
_exptl_absorpt_correction_T_min   0.8010 
_exptl_absorpt_correction_T_max   0.9999 
_exptl_absorpt_process_details    ? 
 
_exptl_special_details 
; 
 ? 
; 
 
_diffrn_ambient_temperature       193(2) 
_diffrn_radiation_wavelength      0.71073 
_diffrn_radiation_type            MoK\a 
_diffrn_radiation_source          'fine-focus sealed tube' 
_diffrn_radiation_monochromator   graphite 
_diffrn_measurement_device_type   Enraf-Nonius CAD4 
_diffrn_measurement_method        ? 
_diffrn_detector_area_resol_mean  ? 
_diffrn_standards_number          ? 
_diffrn_standards_interval_count  ? 
_diffrn_standards_interval_time   ? 
_diffrn_standards_decay_%         19.4 
_diffrn_reflns_number             16523 
_diffrn_reflns_av_R_equivalents   0.0288 
_diffrn_reflns_av_sigmaI/netI     0.0695 
_diffrn_reflns_limit_h_min        -72 
_diffrn_reflns_limit_h_max        71 
_diffrn_reflns_limit_k_min        0 
_diffrn_reflns_limit_k_max        12 
_diffrn_reflns_limit_l_min        0 
_diffrn_reflns_limit_l_max        34 
_diffrn_reflns_theta_min          2.03 
_diffrn_reflns_theta_max          24.98 
_reflns_number_total              16188 
_reflns_number_gt                 10614 
_reflns_threshold_expression      >2sigma(I) 
 
_computing_data_collection        'CAD4 Software (Enraf-Nonius 1989)' 
_computing_cell_refinement        'CAD4 Software (Enraf-Nonius 1989)' 
_computing_data_reduction         'SDP-PLUS (Enraf-Nonius 1988)' 
_computing_structure_solution     'SHELXS-97 (Sheldrick, 1997)' 
_computing_structure_refinement   'SHELXL-97 (Sheldrick, 1997)' 
_computing_molecular_graphics     'SHELXTL' 
_computing_publication_material   'local programs' 
 
_refine_special_details 
; 
 Refinement of F^2^ against ALL reflections.  The weighted R-factor wR and 
 goodness of fit S are based on F^2^, conventional R-factors R are based 
 on F, with F set to zero for negative F^2^. The threshold expression of 
 F^2^ > 2sigma(F^2^) is used only for calculating R-factors(gt) etc. and is 
 not relevant to the choice of reflections for refinement.  R-factors based 
 on F^2^ are statistically about twice as large as those based on F, and R- 
 factors based on ALL data will be even larger. 
; 
 
_refine_ls_structure_factor_coef  Fsqd  
_refine_ls_matrix_type            full 
_refine_ls_weighting_scheme       calc  
_refine_ls_weighting_details 
 'calc w=1/[\s^2^(Fo^2^)+(0.0464P)^2^+152.3001P] where P=(Fo^2^+2Fc^2^)/3' 
_atom_sites_solution_primary      direct 
_atom_sites_solution_secondary    difmap 
_atom_sites_solution_hydrogens    geom 
_refine_ls_hydrogen_treatment     mixed 
_refine_ls_extinction_method      none 
_refine_ls_extinction_coef        ? 
_refine_ls_number_reflns          16188 
_refine_ls_number_parameters      911 
_refine_ls_number_restraints      0 
_refine_ls_R_factor_all           0.1172 
_refine_ls_R_factor_gt            0.0615 
_refine_ls_wR_factor_ref          0.1436 
_refine_ls_wR_factor_gt           0.1286 
_refine_ls_goodness_of_fit_ref    1.056 
_refine_ls_restrained_S_all       1.056 
_refine_ls_shift/su_max           0.000 
_refine_ls_shift/su_mean          0.000 
 
loop_ 
 _atom_site_label 
 _atom_site_type_symbol 
 _atom_site_fract_x 
 _atom_site_fract_y 
 _atom_site_fract_z 
 _atom_site_U_iso_or_equiv 
 _atom_site_adp_type 
 _atom_site_occupancy 
 _atom_site_symmetry_multiplicity 
 _atom_site_calc_flag 
 _atom_site_refinement_flags 
 _atom_site_disorder_assembly 
 _atom_site_disorder_group 
Ga11 Ga 0.219071(12) 0.59869(7) 0.13283(3) 0.03656(18) Uani 1 1 d . . . 
Ga12 Ga 0.209844(10) 0.86272(6) 0.10500(2) 0.02819(16) Uani 1 1 d . . . 
Cl11 Cl 0.25153(3) 0.50850(19) 0.15052(8) 0.0620(5) Uani 1 1 d . . . 
Cl12 Cl 0.19570(4) 0.44771(18) 0.14004(8) 0.0611(5) Uani 1 1 d . . . 
N11 N 0.21233(8) 0.7569(5) 0.16447(17) 0.0304(12) Uani 1 1 d . . . 
N12 N 0.18047(8) 0.9040(5) 0.10532(18) 0.0341(12) Uani 1 1 d . . . 
N13 N 0.21618(8) 0.6964(5) 0.07422(17) 0.0335(12) Uani 1 1 d . . . 
N14 N 0.23495(8) 0.9399(5) 0.09199(19) 0.0386(13) Uani 1 1 d . . . 
C11 C 0.18881(11) 0.7525(6) 0.1670(2) 0.0354(15) Uani 1 1 d . . . 
C12 C 0.17457(11) 0.8262(7) 0.1388(2) 0.0387(16) Uani 1 1 d . . . 
C13 C 0.23910(11) 0.7262(7) 0.0673(3) 0.0425(17) Uani 1 1 d . . . 
C14 C 0.24668(11) 0.8433(7) 0.0756(3) 0.0449(18) Uani 1 1 d . . . 
C111 C 0.22678(10) 0.7971(6) 0.2103(2) 0.0372(15) Uani 1 1 d . . . 
C112 C 0.25030(11) 0.8199(7) 0.2028(3) 0.0509(19) Uani 1 1 d . . . 
H11A H 0.2501 0.8859 0.1790 0.076 Uiso 1 1 calc R . . 
H11B H 0.2562 0.7401 0.1927 0.076 Uiso 1 1 calc R . . 
H11C H 0.2597 0.8484 0.2320 0.076 Uiso 1 1 calc R . . 
C113 C 0.21763(12) 0.9221(7) 0.2269(2) 0.0486(18) Uani 1 1 d . . . 
H11D H 0.2025 0.9076 0.2319 0.073 Uiso 1 1 calc R . . 
H11E H 0.2174 0.9886 0.2033 0.073 Uiso 1 1 calc R . . 
H11F H 0.2272 0.9497 0.2560 0.073 Uiso 1 1 calc R . . 
C114 C 0.22688(13) 0.6943(7) 0.2472(2) 0.054(2) Uani 1 1 d . . . 
H11G H 0.2117 0.6804 0.2519 0.081 Uiso 1 1 calc R . . 
H11H H 0.2363 0.7221 0.2765 0.081 Uiso 1 1 calc R . . 
H11I H 0.2327 0.6142 0.2370 0.081 Uiso 1 1 calc R . . 
C121 C 0.16506(11) 1.0028(7) 0.0828(3) 0.0451(17) Uani 1 1 d . . . 
C122 C 0.16394(14) 1.1121(8) 0.1160(3) 0.067(2) Uani 1 1 d . . . 
H12A H 0.1587 1.0800 0.1433 0.100 Uiso 1 1 calc R . . 
H12B H 0.1536 1.1776 0.1005 0.100 Uiso 1 1 calc R . . 
H12C H 0.1787 1.1497 0.1259 0.100 Uiso 1 1 calc R . . 
C123 C 0.17278(13) 1.0498(8) 0.0403(3) 0.065(2) Uani 1 1 d . . . 
H12D H 0.1735 0.9776 0.0193 0.097 Uiso 1 1 calc R . . 
H12E H 0.1875 1.0884 0.0495 0.097 Uiso 1 1 calc R . . 
H12F H 0.1623 1.1139 0.0244 0.097 Uiso 1 1 calc R . . 
C124 C 0.14156(12) 0.9454(9) 0.0669(3) 0.070(3) Uani 1 1 d . . . 
H12G H 0.1361 0.9147 0.0941 0.106 Uiso 1 1 calc R . . 
H12H H 0.1422 0.8738 0.0457 0.106 Uiso 1 1 calc R . . 
H12I H 0.1315 1.0114 0.0510 0.106 Uiso 1 1 calc R . . 
C131 C 0.20166(12) 0.6445(7) 0.0297(2) 0.0449(17) Uani 1 1 d . . . 
C132 C 0.17783(11) 0.6357(7) 0.0369(2) 0.0508(19) Uani 1 1 d . . . 
H13A H 0.1771 0.5760 0.0623 0.076 Uiso 1 1 calc R . . 
H13B H 0.1682 0.6049 0.0083 0.076 Uiso 1 1 calc R . . 
H13C H 0.1728 0.7206 0.0447 0.076 Uiso 1 1 calc R . . 
C133 C 0.20285(14) 0.7370(8) -0.0096(3) 0.061(2) Uani 1 1 d . . . 
H13D H 0.2182 0.7423 -0.0142 0.091 Uiso 1 1 calc R . . 
H13E H 0.1979 0.8220 -0.0018 0.091 Uiso 1 1 calc R . . 
H13F H 0.1932 0.7064 -0.0383 0.091 Uiso 1 1 calc R . . 
C134 C 0.21012(15) 0.5119(8) 0.0190(3) 0.069(2) Uani 1 1 d . . . 
H13G H 0.2254 0.5192 0.0142 0.103 Uiso 1 1 calc R . . 
H13H H 0.2006 0.4778 -0.0092 0.103 Uiso 1 1 calc R . . 
H13I H 0.2097 0.4541 0.0451 0.103 Uiso 1 1 calc R . . 
C141 C 0.24246(12) 1.0736(7) 0.0909(3) 0.0467(18) Uani 1 1 d . . . 
C142 C 0.23801(15) 1.1238(9) 0.0409(3) 0.073(3) Uani 1 1 d . . . 
H14A H 0.2462 1.0717 0.0222 0.110 Uiso 1 1 calc R . . 
H14B H 0.2429 1.2131 0.0408 0.110 Uiso 1 1 calc R . . 
H14C H 0.2221 1.1188 0.0278 0.110 Uiso 1 1 calc R . . 
C143 C 0.26759(12) 1.0856(8) 0.1115(3) 0.075(3) Uani 1 1 d . . . 
H14D H 0.2760 1.0360 0.0925 0.112 Uiso 1 1 calc R . . 
H14E H 0.2707 1.0525 0.1433 0.112 Uiso 1 1 calc R . . 
H14F H 0.2720 1.1758 0.1117 0.112 Uiso 1 1 calc R . . 
C144 C 0.23011(12) 1.1517(7) 0.1208(3) 0.055(2) Uani 1 1 d . . . 
H14G H 0.2330 1.1169 0.1524 0.082 Uiso 1 1 calc R . . 
H14H H 0.2141 1.1479 0.1078 0.082 Uiso 1 1 calc R . . 
H14I H 0.2351 1.2408 0.1215 0.082 Uiso 1 1 calc R . . 
H11 H 0.1853(8) 0.699(5) 0.1893(18) 0.016(14) Uiso 1 1 d . . . 
H12 H 0.1593(10) 0.825(5) 0.1393(19) 0.030(16) Uiso 1 1 d . . . 
H13 H 0.2463(9) 0.653(6) 0.0578(19) 0.024(15) Uiso 1 1 d . . . 
H14 H 0.2601(13) 0.861(8) 0.075(3) 0.07(3) Uiso 1 1 d . . . 
Ga21 Ga 0.145773(15) 0.37963(7) 0.33423(3) 0.0499(2) Uani 1 1 d . . . 
Ga22 Ga 0.146815(11) 0.10866(7) 0.31406(2) 0.03311(17) Uani 1 1 d . . . 
Cl21 Cl 0.16338(4) 0.47540(19) 0.39680(8) 0.0759(7) Uani 1 1 d . . . 
Cl22 Cl 0.12771(5) 0.5329(2) 0.29346(9) 0.0899(8) Uani 1 1 d . . . 
N21 N 0.16553(12) 0.2665(6) 0.3059(2) 0.0616(19) Uani 1 1 d . . . 
N22 N 0.16870(12) 0.0296(6) 0.3567(3) 0.076(2) Uani 1 1 d . . . 
N23 N 0.12756(9) 0.2320(5) 0.3418(2) 0.0502(16) Uani 1 1 d . . . 
N24 N 0.12597(9) 0.0679(5) 0.2621(2) 0.0473(15) Uani 1 1 d . . . 
C21 C 0.18742(15) 0.2412(8) 0.3453(3) 0.069(3) Uani 1 1 d . . . 
H21 H 0.1991 0.3013 0.3540 0.082 Uiso 1 1 calc R . . 
C22 C 0.18696(15) 0.1189(9) 0.3651(3) 0.077(3) Uani 1 1 d . . . 
H22 H 0.2000 0.0924 0.3861 0.093 Uiso 1 1 calc R . . 
C23 C 0.10811(17) 0.2428(9) 0.2983(3) 0.082(3) Uani 1 1 d . . . 
H23 H 0.0966 0.3040 0.2971 0.098 Uiso 1 1 calc R . . 
C24 C 0.10845(15) 0.1620(10) 0.2628(4) 0.080(3) Uani 1 1 d . . . 
H24 H 0.0966 0.1664 0.2367 0.096 Uiso 1 1 calc R . . 
C211 C 0.17522(15) 0.3043(8) 0.2672(4) 0.072(3) Uani 1 1 d . . . 
C212 C 0.15295(17) 0.3191(11) 0.2270(3) 0.100(4) Uani 1 1 d . . . 
H21A H 0.1452 0.2368 0.2225 0.150 Uiso 1 1 calc R . . 
H21B H 0.1571 0.3456 0.1979 0.150 Uiso 1 1 calc R . . 
H21C H 0.1432 0.3838 0.2365 0.150 Uiso 1 1 calc R . . 
C213 C 0.18681(14) 0.4301(8) 0.2728(3) 0.064(2) Uani 1 1 d . . . 
H21D H 0.1770 0.4948 0.2822 0.096 Uiso 1 1 calc R . . 
H21E H 0.1907 0.4553 0.2433 0.096 Uiso 1 1 calc R . . 
H21F H 0.2004 0.4229 0.2968 0.096 Uiso 1 1 calc R . . 
C214 C 0.18913(12) 0.1988(8) 0.2525(3) 0.062(2) Uani 1 1 d . . . 
H21G H 0.1807 0.1187 0.2490 0.093 Uiso 1 1 calc R . . 
H21H H 0.2027 0.1879 0.2761 0.093 Uiso 1 1 calc R . . 
H21I H 0.1931 0.2214 0.2227 0.093 Uiso 1 1 calc R . . 
C221 C 0.17440(13) -0.0995(7) 0.3718(3) 0.061(2) Uani 1 1 d . . . 
C222 C 0.18661(16) -0.1699(9) 0.3384(3) 0.081(3) Uani 1 1 d . . . 
H22A H 0.1773 -0.1701 0.3071 0.121 Uiso 1 1 calc R . . 
H22B H 0.1896 -0.2583 0.3490 0.121 Uiso 1 1 calc R . . 
H22C H 0.2007 -0.1261 0.3377 0.121 Uiso 1 1 calc R . . 
C223 C 0.15208(18) -0.1679(9) 0.3679(4) 0.104(4) Uani 1 1 d . . . 
H22D H 0.1438 -0.1633 0.3358 0.156 Uiso 1 1 calc R . . 
H22E H 0.1435 -0.1264 0.3885 0.156 Uiso 1 1 calc R . . 
H22F H 0.1547 -0.2578 0.3770 0.156 Uiso 1 1 calc R . . 
C224 C 0.1876(2) -0.1031(12) 0.4196(3) 0.154(7) Uani 1 1 d . . . 
H22G H 0.1796 -0.0577 0.4404 0.231 Uiso 1 1 calc R . . 
H22H H 0.2020 -0.0616 0.4204 0.231 Uiso 1 1 calc R . . 
H22I H 0.1900 -0.1923 0.4297 0.231 Uiso 1 1 calc R . . 
C231 C 0.1178(2) 0.2104(9) 0.3817(4) 0.100(4) Uani 1 1 d . . . 
C232 C 0.10123(15) 0.0959(8) 0.3751(3) 0.075(3) Uani 1 1 d . . . 
H23A H 0.0882 0.1177 0.3513 0.112 Uiso 1 1 calc R . . 
H23B H 0.0966 0.0778 0.4045 0.112 Uiso 1 1 calc R . . 
H23C H 0.1085 0.0201 0.3652 0.112 Uiso 1 1 calc R . . 
C233 C 0.13897(17) 0.1818(9) 0.4188(4) 0.092(3) Uani 1 1 d . . . 
H23D H 0.1463 0.1052 0.4097 0.138 Uiso 1 1 calc R . . 
H23E H 0.1349 0.1672 0.4490 0.138 Uiso 1 1 calc R . . 
H23F H 0.1491 0.2549 0.4211 0.138 Uiso 1 1 calc R . . 
C234 C 0.10484(18) 0.3290(11) 0.3920(4) 0.098(3) Uiso 1 1 d . . . 
H23G H 0.0919 0.3412 0.3670 0.147 Uiso 1 1 calc R . . 
H23H H 0.1145 0.4045 0.3942 0.147 Uiso 1 1 calc R . . 
H23I H 0.0999 0.3169 0.4215 0.147 Uiso 1 1 calc R . . 
C241 C 0.12038(13) -0.0434(8) 0.2314(3) 0.061(2) Uani 1 1 d . . . 
C242 C 0.14115(14) -0.1171(9) 0.2298(3) 0.078(3) Uani 1 1 d . . . 
H24A H 0.1521 -0.0599 0.2203 0.117 Uiso 1 1 calc R . . 
H24B H 0.1377 -0.1873 0.2073 0.117 Uiso 1 1 calc R . . 
H24C H 0.1472 -0.1522 0.2606 0.117 Uiso 1 1 calc R . . 
C243 C 0.1044(2) -0.1263(11) 0.2464(6) 0.173(8) Uani 1 1 d . . . 
H24D H 0.0908 -0.0777 0.2473 0.260 Uiso 1 1 calc R . . 
H24E H 0.1106 -0.1594 0.2775 0.260 Uiso 1 1 calc R . . 
H24F H 0.1008 -0.1979 0.2247 0.260 Uiso 1 1 calc R . . 
C244 C 0.11147(19) 0.0098(12) 0.1805(3) 0.112(4) Uani 1 1 d . . . 
H24G H 0.1227 0.0654 0.1714 0.168 Uiso 1 1 calc R . . 
H24H H 0.0978 0.0589 0.1799 0.168 Uiso 1 1 calc R . . 
H24I H 0.1083 -0.0620 0.1587 0.168 Uiso 1 1 calc R . . 
Ga31 Ga 0.075036(12) 0.67935(7) 0.04599(3) 0.03881(19) Uani 1 1 d . . . 
Ga32 Ga 0.073897(11) 0.40821(7) 0.02430(3) 0.03527(18) Uani 1 1 d . . . 
Cl31 Cl 0.06402(3) 0.77436(17) 0.10321(7) 0.0566(5) Uani 1 1 d . . . 
Cl32 Cl 0.08742(3) 0.83259(17) 0.00787(7) 0.0560(5) Uani 1 1 d . . . 
N31 N 0.09647(8) 0.5362(5) 0.05896(19) 0.0384(13) Uani 1 1 d . . . 
N32 N 0.09194(8) 0.3749(5) -0.01845(19) 0.0406(13) Uani 1 1 d . . . 
N33 N 0.05239(8) 0.5590(5) 0.01288(19) 0.0361(13) Uani 1 1 d . . . 
N34 N 0.05583(9) 0.3218(5) 0.0578(2) 0.0473(15) Uani 1 1 d . . . 
C31 C 0.11127(11) 0.5448(7) 0.0255(3) 0.0444(18) Uani 1 1 d . . . 
C32 C 0.10882(11) 0.4635(7) -0.0097(3) 0.0459(18) Uani 1 1 d . . . 
C33 C 0.03793(12) 0.5246(7) 0.0450(3) 0.0451(18) Uani 1 1 d . . . 
C34 C 0.03987(12) 0.4088(7) 0.0649(3) 0.0471(18) Uani 1 1 d . . . 
C311 C 0.10956(11) 0.5114(7) 0.1078(3) 0.0487(19) Uani 1 1 d . . . 
C312 C 0.09332(13) 0.4853(8) 0.1396(3) 0.058(2) Uani 1 1 d . . . 
H31A H 0.0839 0.4119 0.1278 0.087 Uiso 1 1 calc R . . 
H31B H 0.0840 0.5609 0.1406 0.087 Uiso 1 1 calc R . . 
H31C H 0.1016 0.4663 0.1710 0.087 Uiso 1 1 calc R . . 
C313 C 0.12436(12) 0.3931(7) 0.1059(3) 0.061(2) Uani 1 1 d . . . 
H31D H 0.1348 0.4109 0.0854 0.092 Uiso 1 1 calc R . . 
H31E H 0.1150 0.3197 0.0939 0.092 Uiso 1 1 calc R . . 
H31F H 0.1326 0.3736 0.1372 0.092 Uiso 1 1 calc R . . 
C314 C 0.12395(14) 0.6256(8) 0.1254(3) 0.069(2) Uani 1 1 d . . . 
H31G H 0.1343 0.6418 0.1047 0.103 Uiso 1 1 calc R . . 
H31H H 0.1323 0.6079 0.1568 0.103 Uiso 1 1 calc R . . 
H31I H 0.1145 0.7011 0.1261 0.103 Uiso 1 1 calc R . . 
C321 C 0.09350(12) 0.2691(7) -0.0507(2) 0.0453(18) Uani 1 1 d . . . 
C322 C 0.07238(12) 0.1922(8) -0.0578(3) 0.061(2) Uani 1 1 d . . . 
H32A H 0.0701 0.1602 -0.0277 0.091 Uiso 1 1 calc R . . 
H32B H 0.0735 0.1196 -0.0784 0.091 Uiso 1 1 calc R . . 
H32C H 0.0598 0.2465 -0.0718 0.091 Uiso 1 1 calc R . . 
C323 C 0.09668(16) 0.3183(8) -0.0974(3) 0.072(3) Uani 1 1 d . . . 
H32D H 0.1103 0.3694 -0.0933 0.108 Uiso 1 1 calc R . . 
H32E H 0.0840 0.3717 -0.1112 0.108 Uiso 1 1 calc R . . 
H32F H 0.0978 0.2457 -0.1180 0.108 Uiso 1 1 calc R . . 
C324 C 0.11321(13) 0.1828(8) -0.0298(3) 0.065(2) Uani 1 1 d . . . 
H32G H 0.1270 0.2327 -0.0254 0.097 Uiso 1 1 calc R . . 
H32H H 0.1141 0.1113 -0.0509 0.097 Uiso 1 1 calc R . . 
H32I H 0.1111 0.1495 0.0002 0.097 Uiso 1 1 calc R . . 
C331 C 0.03870(11) 0.5931(7) -0.0347(2) 0.0441(17) Uani 1 1 d . . . 
C332 C 0.05441(12) 0.6133(8) -0.0680(3) 0.0542(19) Uani 1 1 d . . . 
H33A H 0.0644 0.6852 -0.0571 0.081 Uiso 1 1 calc R . . 
H33B H 0.0458 0.6323 -0.0990 0.081 Uiso 1 1 calc R . . 
H33C H 0.0632 0.5355 -0.0691 0.081 Uiso 1 1 calc R . . 
C333 C 0.02330(12) 0.4815(8) -0.0514(3) 0.059(2) Uani 1 1 d . . . 
H33D H 0.0131 0.4687 -0.0300 0.089 Uiso 1 1 calc R . . 
H33E H 0.0321 0.4036 -0.0525 0.089 Uiso 1 1 calc R . . 
H33F H 0.0147 0.5001 -0.0826 0.089 Uiso 1 1 calc R . . 
C334 C 0.02534(13) 0.7147(8) -0.0323(3) 0.065(2) Uani 1 1 d . . . 
H33G H 0.0355 0.7859 -0.0217 0.097 Uiso 1 1 calc R . . 
H33H H 0.0154 0.7023 -0.0104 0.097 Uiso 1 1 calc R . . 
H33I H 0.0166 0.7343 -0.0632 0.097 Uiso 1 1 calc R . . 
C341 C 0.05470(13) 0.1889(7) 0.0735(3) 0.056(2) Uani 1 1 d . . . 
C342 C 0.07730(12) 0.1264(7) 0.0741(3) 0.058(2) Uani 1 1 d . . . 
H34A H 0.0888 0.1718 0.0962 0.087 Uiso 1 1 calc R . . 
H34B H 0.0808 0.1307 0.0430 0.087 Uiso 1 1 calc R . . 
H34C H 0.0768 0.0366 0.0836 0.087 Uiso 1 1 calc R . . 
C343 C 0.03680(14) 0.1151(8) 0.0394(4) 0.079(3) Uani 1 1 d . . . 
H34D H 0.0223 0.1546 0.0386 0.119 Uiso 1 1 calc R . . 
H34E H 0.0365 0.0258 0.0495 0.119 Uiso 1 1 calc R . . 
H34F H 0.0403 0.1178 0.0083 0.119 Uiso 1 1 calc R . . 
C344 C 0.04973(16) 0.1804(8) 0.1223(3) 0.079(3) Uani 1 1 d . . . 
H34G H 0.0353 0.2196 0.1225 0.119 Uiso 1 1 calc R . . 
H34H H 0.0613 0.2260 0.1441 0.119 Uiso 1 1 calc R . . 
H34I H 0.0495 0.0904 0.1315 0.119 Uiso 1 1 calc R . . 
H31 H 0.1216(13) 0.607(8) 0.029(3) 0.07(3) Uiso 1 1 d . . . 
H32 H 0.1184(10) 0.470(6) -0.032(2) 0.034(17) Uiso 1 1 d . . . 
H33 H 0.0288(13) 0.576(8) 0.057(3) 0.07(3) Uiso 1 1 d . . . 
H34 H 0.0322(11) 0.390(6) 0.088(2) 0.04(2) Uiso 1 1 d . . . 
Ga41 Ga 0.0000 0.43829(11) 0.2500 0.0557(3) Uani 1 2 d S . . 
Ga42 Ga 0.0000 0.71440(10) 0.2500 0.0439(3) Uani 1 2 d S . . 
Cl4 Cl 0.00504(5) 0.3131(3) 0.31008(13) 0.1216(13) Uani 1 1 d . . . 
N41 N 0.02293(9) 0.5711(5) 0.2576(2) 0.0477(15) Uani 1 1 d . . . 
N42 N 0.01002(12) 0.7758(6) 0.3092(2) 0.069(2) Uani 1 1 d . . . 
C41 C 0.03218(13) 0.5840(8) 0.3088(3) 0.062(2) Uani 1 1 d . . . 
H41 H 0.0422 0.5227 0.3252 0.074 Uiso 1 1 calc R . . 
C42 C 0.02570(16) 0.6851(9) 0.3303(3) 0.078(3) Uani 1 1 d . . . 
H42 H 0.0321 0.6967 0.3622 0.093 Uiso 1 1 calc R . . 
C411 C 0.04170(15) 0.5618(10) 0.2323(4) 0.086(3) Uani 1 1 d . . . 
C412 C 0.03100(18) 0.5700(12) 0.1795(3) 0.103(4) Uani 1 1 d . . . 
H41A H 0.0204 0.4998 0.1712 0.154 Uiso 1 1 calc R . . 
H41B H 0.0426 0.5633 0.1611 0.154 Uiso 1 1 calc R . . 
H41C H 0.0233 0.6521 0.1730 0.154 Uiso 1 1 calc R . . 
C413 C 0.05427(15) 0.4335(10) 0.2440(4) 0.106(4) Uani 1 1 d . . . 
H41D H 0.0440 0.3620 0.2354 0.159 Uiso 1 1 calc R . . 
H41E H 0.0605 0.4299 0.2774 0.159 Uiso 1 1 calc R . . 
H41F H 0.0663 0.4276 0.2267 0.159 Uiso 1 1 calc R . . 
C414 C 0.05794(16) 0.6702(11) 0.2459(4) 0.109(4) Uani 1 1 d . . . 
H41G H 0.0503 0.7522 0.2389 0.163 Uiso 1 1 calc R . . 
H41H H 0.0699 0.6634 0.2285 0.163 Uiso 1 1 calc R . . 
H41I H 0.0642 0.6652 0.2793 0.163 Uiso 1 1 calc R . . 
C421 C 0.00701(17) 0.8954(9) 0.3343(4) 0.088(3) Uani 1 1 d . . . 
C422 C -0.01327(18) 0.9623(10) 0.3081(5) 0.127(5) Uani 1 1 d . . . 
H42A H -0.0263 0.9070 0.3067 0.190 Uiso 1 1 calc R . . 
H42B H -0.0113 0.9815 0.2765 0.190 Uiso 1 1 calc R . . 
H42C H -0.0155 1.0424 0.3240 0.190 Uiso 1 1 calc R . . 
C424 C 0.02770(18) 0.9809(10) 0.3363(5) 0.125(5) Uani 1 1 d . . . 
H42D H 0.0408 0.9367 0.3538 0.187 Uiso 1 1 calc R . . 
H42E H 0.0256 1.0618 0.3518 0.187 Uiso 1 1 calc R . . 
H42F H 0.0298 0.9983 0.3047 0.187 Uiso 1 1 calc R . . 
C423 C 0.0046(2) 0.8706(13) 0.3841(4) 0.131(5) Uani 1 1 d . . . 
H42G H 0.0180 0.8277 0.4011 0.197 Uiso 1 1 calc R . . 
H42H H -0.0084 0.8159 0.3841 0.197 Uiso 1 1 calc R . . 
H42I H 0.0026 0.9522 0.3993 0.197 Uiso 1 1 calc R . . 
 
loop_ 
 _atom_site_aniso_label 
 _atom_site_aniso_U_11 
 _atom_site_aniso_U_22 
 _atom_site_aniso_U_33 
 _atom_site_aniso_U_23 
 _atom_site_aniso_U_13 
 _atom_site_aniso_U_12 
Ga11 0.0375(4) 0.0297(4) 0.0410(4) -0.0005(3) 0.0042(3) 0.0032(3) 
Ga12 0.0248(3) 0.0301(4) 0.0296(4) 0.0003(3) 0.0054(3) 0.0010(3) 
Cl11 0.0511(11) 0.0525(11) 0.0765(14) 0.0031(11) -0.0017(10) 0.0237(9) 
Cl12 0.0728(14) 0.0390(10) 0.0738(14) -0.0002(10) 0.0201(11) -0.0152(9) 
N11 0.031(3) 0.032(3) 0.027(3) 0.001(2) 0.004(2) 0.002(2) 
N12 0.025(3) 0.040(3) 0.036(3) 0.003(3) 0.004(2) 0.005(2) 
N13 0.037(3) 0.031(3) 0.032(3) -0.001(2) 0.006(2) 0.001(2) 
N14 0.033(3) 0.039(3) 0.046(3) 0.000(3) 0.014(3) -0.003(2) 
C11 0.037(4) 0.037(4) 0.034(4) 0.005(3) 0.010(3) -0.005(3) 
C12 0.027(3) 0.046(4) 0.042(4) -0.005(3) 0.005(3) -0.001(3) 
C13 0.037(4) 0.046(4) 0.048(5) -0.003(4) 0.015(3) 0.009(3) 
C14 0.024(4) 0.055(5) 0.057(5) 0.002(4) 0.011(3) -0.003(3) 
C111 0.036(4) 0.044(4) 0.029(4) -0.001(3) -0.001(3) 0.000(3) 
C112 0.034(4) 0.061(5) 0.051(5) -0.006(4) -0.005(3) -0.002(3) 
C113 0.052(4) 0.051(4) 0.039(4) -0.010(4) 0.000(3) -0.002(4) 
C114 0.057(5) 0.056(5) 0.043(4) 0.010(4) -0.005(4) 0.004(4) 
C121 0.036(4) 0.045(4) 0.055(5) 0.007(4) 0.010(3) 0.014(3) 
C122 0.070(6) 0.049(5) 0.084(6) -0.005(5) 0.025(5) 0.016(4) 
C123 0.058(5) 0.070(6) 0.063(6) 0.024(5) 0.005(4) 0.022(4) 
C124 0.035(4) 0.086(7) 0.085(6) 0.008(5) -0.001(4) 0.011(4) 
C131 0.049(4) 0.041(4) 0.041(4) -0.014(3) 0.002(3) 0.007(3) 
C132 0.044(4) 0.056(5) 0.047(4) -0.013(4) -0.006(3) -0.006(4) 
C133 0.068(5) 0.074(6) 0.038(5) 0.001(4) 0.006(4) 0.005(4) 
C134 0.087(6) 0.052(5) 0.064(6) -0.026(4) 0.004(5) 0.006(5) 
C141 0.045(4) 0.040(4) 0.057(5) 0.004(4) 0.016(4) -0.010(3) 
C142 0.073(6) 0.083(6) 0.068(6) 0.031(5) 0.023(5) 0.001(5) 
C143 0.045(5) 0.061(5) 0.115(8) 0.005(5) 0.007(5) -0.023(4) 
C144 0.055(5) 0.035(4) 0.072(5) -0.009(4) 0.008(4) -0.019(3) 
Ga21 0.0740(6) 0.0294(4) 0.0462(5) 0.0024(4) 0.0113(4) 0.0116(4) 
Ga22 0.0328(4) 0.0283(4) 0.0362(4) -0.0026(3) 0.0019(3) 0.0031(3) 
Cl21 0.116(2) 0.0414(11) 0.0652(14) -0.0149(10) 0.0060(13) -0.0048(12) 
Cl22 0.127(2) 0.0520(13) 0.0877(18) 0.0222(12) 0.0154(16) 0.0412(14) 
N21 0.102(6) 0.031(3) 0.062(4) 0.007(3) 0.042(4) 0.004(3) 
N22 0.078(5) 0.027(3) 0.094(6) 0.008(3) -0.051(4) -0.003(3) 
N23 0.038(3) 0.041(3) 0.072(5) -0.019(3) 0.012(3) 0.003(3) 
N24 0.048(3) 0.039(3) 0.048(4) -0.005(3) -0.006(3) -0.009(3) 
C21 0.070(6) 0.061(5) 0.059(6) -0.001(4) -0.023(4) 0.025(5) 
C22 0.068(6) 0.068(6) 0.087(7) 0.003(5) -0.004(5) 0.015(5) 
C23 0.102(8) 0.065(6) 0.073(7) -0.009(5) 0.002(6) 0.024(6) 
C24 0.063(6) 0.083(7) 0.087(7) 0.001(6) 0.002(5) 0.000(5) 
C211 0.067(6) 0.046(5) 0.114(8) -0.009(5) 0.047(6) -0.015(4) 
C212 0.097(8) 0.117(9) 0.066(6) -0.029(6) -0.033(6) 0.042(7) 
C213 0.075(6) 0.055(5) 0.062(5) 0.000(4) 0.015(4) -0.026(4) 
C214 0.045(4) 0.068(5) 0.077(6) -0.006(5) 0.022(4) -0.008(4) 
C221 0.048(4) 0.039(4) 0.096(7) 0.023(4) 0.013(4) 0.011(4) 
C222 0.078(6) 0.072(6) 0.093(7) -0.003(6) 0.020(6) 0.001(5) 
C223 0.115(9) 0.054(6) 0.168(12) -0.002(7) 0.089(9) 0.003(6) 
C224 0.258(17) 0.139(11) 0.044(6) 0.005(7) -0.022(8) 0.120(12) 
C231 0.133(10) 0.051(6) 0.144(11) -0.005(6) 0.095(9) 0.009(6) 
C232 0.088(7) 0.058(6) 0.087(7) 0.012(5) 0.040(5) -0.009(5) 
C233 0.098(8) 0.056(6) 0.107(8) 0.003(6) -0.015(7) 0.001(5) 
C241 0.051(5) 0.066(5) 0.066(6) -0.029(5) 0.011(4) -0.013(4) 
C242 0.072(6) 0.073(6) 0.094(7) -0.016(6) 0.029(5) 0.010(5) 
C243 0.138(11) 0.074(8) 0.35(2) -0.093(11) 0.159(14) -0.057(8) 
C244 0.125(10) 0.123(10) 0.072(7) -0.033(7) -0.020(7) 0.016(8) 
Ga31 0.0349(4) 0.0310(4) 0.0515(5) -0.0010(3) 0.0107(3) -0.0021(3) 
Ga32 0.0282(4) 0.0315(4) 0.0463(4) -0.0023(3) 0.0077(3) -0.0006(3) 
Cl31 0.0675(13) 0.0405(10) 0.0666(13) -0.0091(9) 0.0250(10) -0.0006(9) 
Cl32 0.0578(11) 0.0397(10) 0.0737(13) 0.0027(9) 0.0206(10) -0.0124(9) 
N31 0.031(3) 0.035(3) 0.048(3) -0.003(3) 0.004(3) -0.003(2) 
N32 0.034(3) 0.039(3) 0.049(3) -0.008(3) 0.009(3) 0.004(3) 
N33 0.028(3) 0.035(3) 0.046(3) 0.001(3) 0.008(2) -0.002(2) 
N34 0.046(3) 0.035(3) 0.064(4) 0.004(3) 0.019(3) -0.008(3) 
C31 0.031(4) 0.046(4) 0.057(5) -0.005(4) 0.012(3) -0.004(3) 
C32 0.032(4) 0.049(5) 0.059(5) 0.005(4) 0.017(4) 0.005(3) 
C33 0.038(4) 0.041(4) 0.061(5) -0.005(4) 0.020(4) 0.002(3) 
C34 0.040(4) 0.043(4) 0.064(5) 0.000(4) 0.023(4) -0.005(3) 
C311 0.034(4) 0.049(4) 0.057(5) -0.005(4) -0.006(3) -0.004(3) 
C312 0.070(5) 0.061(5) 0.040(4) 0.000(4) 0.002(4) -0.004(4) 
C313 0.052(5) 0.055(5) 0.065(5) -0.002(4) -0.016(4) 0.016(4) 
C314 0.064(5) 0.055(5) 0.077(6) -0.021(5) -0.009(5) -0.007(4) 
C321 0.047(4) 0.041(4) 0.046(4) -0.006(3) 0.005(3) 0.011(3) 
C322 0.055(5) 0.059(5) 0.065(5) -0.023(4) 0.002(4) 0.003(4) 
C323 0.098(7) 0.064(6) 0.059(5) -0.013(5) 0.026(5) 0.011(5) 
C324 0.054(5) 0.060(5) 0.075(6) -0.003(5) 0.000(4) 0.026(4) 
C331 0.034(4) 0.044(4) 0.053(4) 0.005(4) 0.005(3) 0.008(3) 
C332 0.049(4) 0.062(5) 0.052(5) 0.009(4) 0.010(4) 0.006(4) 
C333 0.034(4) 0.071(6) 0.069(6) -0.001(5) 0.003(4) -0.004(4) 
C334 0.051(5) 0.063(5) 0.080(6) 0.009(5) 0.014(4) 0.023(4) 
C341 0.061(5) 0.035(4) 0.076(6) 0.003(4) 0.019(4) -0.008(4) 
C342 0.058(5) 0.036(4) 0.077(6) 0.015(4) 0.008(4) 0.006(4) 
C343 0.055(5) 0.043(5) 0.136(9) -0.002(5) 0.009(5) -0.013(4) 
C344 0.101(7) 0.052(5) 0.095(7) 0.018(5) 0.045(6) 0.003(5) 
Ga41 0.0445(7) 0.0329(6) 0.0875(10) 0.000 0.0081(6) 0.000 
Ga42 0.0385(6) 0.0360(6) 0.0522(7) 0.000 -0.0030(5) 0.000 
Cl4 0.0884(19) 0.0763(18) 0.188(3) 0.077(2) -0.002(2) -0.0023(15) 
N41 0.036(3) 0.039(3) 0.068(4) 0.000(3) 0.009(3) 0.000(3) 
N42 0.080(5) 0.054(4) 0.060(5) -0.013(4) -0.020(4) 0.017(4) 
C41 0.058(5) 0.054(5) 0.068(6) -0.005(4) -0.001(4) 0.008(4) 
C42 0.083(7) 0.066(6) 0.072(6) -0.003(5) -0.014(5) -0.001(5) 
C411 0.052(5) 0.080(7) 0.134(10) -0.003(7) 0.041(6) -0.004(5) 
C412 0.101(8) 0.141(11) 0.070(7) -0.001(7) 0.029(6) -0.012(8) 
C413 0.055(6) 0.105(9) 0.161(11) -0.016(8) 0.028(7) 0.034(6) 
C414 0.056(6) 0.120(10) 0.152(11) 0.007(8) 0.024(7) -0.033(6) 
C421 0.086(7) 0.064(6) 0.095(8) -0.033(6) -0.026(6) 0.024(5) 
C422 0.086(8) 0.081(8) 0.187(13) -0.040(8) -0.038(8) 0.023(6) 
C424 0.099(9) 0.061(7) 0.183(13) -0.022(8) -0.047(9) 0.011(6) 
C423 0.158(12) 0.134(11) 0.093(9) -0.062(8) 0.002(8) 0.034(10) 
 
_geom_special_details 
; 
 All esds (except the esd in the dihedral angle between two l.s. planes) 
 are estimated using the full covariance matrix.  The cell esds are taken 
 into account individually in the estimation of esds in distances, angles 
 and torsion angles; correlations between esds in cell parameters are only 
 used when they are defined by crystal symmetry.  An approximate (isotropic) 
 treatment of cell esds is used for estimating esds involving l.s. planes. 
; 
 
loop_ 
 _geom_bond_atom_site_label_1 
 _geom_bond_atom_site_label_2 
 _geom_bond_distance 
 _geom_bond_site_symmetry_2 
 _geom_bond_publ_flag 
Ga11 N13 1.979(5) . ? 
Ga11 N11 1.979(5) . ? 
Ga11 Cl12 2.171(2) . ? 
Ga11 Cl11 2.1731(19) . ? 
Ga11 Ga12 2.8992(10) . ? 
Ga12 N14 1.846(5) . ? 
Ga12 N12 1.857(5) . ? 
Ga12 N13 2.031(5) . ? 
Ga12 N11 2.047(5) . ? 
N11 C11 1.462(8) . ? 
N11 C111 1.518(8) . ? 
N12 C12 1.380(8) . ? 
N12 C121 1.466(8) . ? 
N13 C13 1.495(8) . ? 
N13 C131 1.527(8) . ? 
N14 C14 1.381(9) . ? 
N14 C141 1.473(8) . ? 
C11 C12 1.325(9) . ? 
C11 H11 0.92(5) . ? 
C12 H12 0.94(6) . ? 
C13 C14 1.314(10) . ? 
C13 H13 0.95(6) . ? 
C14 H14 0.85(8) . ? 
C111 C112 1.523(9) . ? 
C111 C114 1.524(9) . ? 
C111 C113 1.538(9) . ? 
C112 H11A 0.9800 . ? 
C112 H11B 0.9800 . ? 
C112 H11C 0.9800 . ? 
C113 H11D 0.9800 . ? 
C113 H11E 0.9800 . ? 
C113 H11F 0.9800 . ? 
C114 H11G 0.9800 . ? 
C114 H11H 0.9800 . ? 
C114 H11I 0.9800 . ? 
C121 C123 1.502(10) . ? 
C121 C122 1.513(10) . ? 
C121 C124 1.547(10) . ? 
C122 H12A 0.9800 . ? 
C122 H12B 0.9800 . ? 
C122 H12C 0.9800 . ? 
C123 H12D 0.9800 . ? 
C123 H12E 0.9800 . ? 
C123 H12F 0.9800 . ? 
C124 H12G 0.9800 . ? 
C124 H12H 0.9800 . ? 
C124 H12I 0.9800 . ? 
C131 C133 1.520(10) . ? 
C131 C132 1.523(9) . ? 
C131 C134 1.533(10) . ? 
C132 H13A 0.9800 . ? 
C132 H13B 0.9800 . ? 
C132 H13C 0.9800 . ? 
C133 H13D 0.9800 . ? 
C133 H13E 0.9800 . ? 
C133 H13F 0.9800 . ? 
C134 H13G 0.9800 . ? 
C134 H13H 0.9800 . ? 
C134 H13I 0.9800 . ? 
C141 C144 1.509(10) . ? 
C141 C142 1.530(10) . ? 
C141 C143 1.548(10) . ? 
C142 H14A 0.9800 . ? 
C142 H14B 0.9800 . ? 
C142 H14C 0.9800 . ? 
C143 H14D 0.9800 . ? 
C143 H14E 0.9800 . ? 
C143 H14F 0.9800 . ? 
C144 H14G 0.9800 . ? 
C144 H14H 0.9800 . ? 
C144 H14I 0.9800 . ? 
Ga21 N23 1.943(6) . ? 
Ga21 N21 1.991(6) . ? 
Ga21 Cl22 2.168(2) . ? 
Ga21 Cl21 2.182(2) . ? 
Ga21 Ga22 2.8938(10) . ? 
Ga22 N24 1.837(5) . ? 
Ga22 N22 1.842(6) . ? 
Ga22 N23 2.026(6) . ? 
Ga22 N21 2.051(6) . ? 
N21 C211 1.439(10) . ? 
N21 C21 1.612(10) . ? 
N22 C221 1.441(9) . ? 
N22 C22 1.442(11) . ? 
N23 C231 1.438(11) . ? 
N23 C23 1.571(11) . ? 
N24 C24 1.461(11) . ? 
N24 C241 1.469(9) . ? 
C21 C22 1.405(12) . ? 
C21 H21 0.9500 . ? 
C22 H22 0.9500 . ? 
C23 C24 1.343(12) . ? 
C23 H23 0.9500 . ? 
C24 H24 0.9500 . ? 
C211 C213 1.488(10) . ? 
C211 C214 1.508(11) . ? 
C211 C212 1.627(12) . ? 
C212 H21A 0.9800 . ? 
C212 H21B 0.9800 . ? 
C212 H21C 0.9800 . ? 
C213 H21D 0.9800 . ? 
C213 H21E 0.9800 . ? 
C213 H21F 0.9800 . ? 
C214 H21G 0.9800 . ? 
C214 H21H 0.9800 . ? 
C214 H21I 0.9800 . ? 
C221 C224 1.474(12) . ? 
C221 C223 1.530(12) . ? 
C221 C222 1.536(12) . ? 
C222 H22A 0.9800 . ? 
C222 H22B 0.9800 . ? 
C222 H22C 0.9800 . ? 
C223 H22D 0.9800 . ? 
C223 H22E 0.9800 . ? 
C223 H22F 0.9800 . ? 
C224 H22G 0.9800 . ? 
C224 H22H 0.9800 . ? 
C224 H22I 0.9800 . ? 
C231 C234 1.534(13) . ? 
C231 C233 1.553(15) . ? 
C231 C232 1.555(13) . ? 
C232 H23A 0.9800 . ? 
C232 H23B 0.9800 . ? 
C232 H23C 0.9800 . ? 
C233 H23D 0.9800 . ? 
C233 H23E 0.9800 . ? 
C233 H23F 0.9800 . ? 
C234 H23G 0.9800 . ? 
C234 H23H 0.9800 . ? 
C234 H23I 0.9800 . ? 
C241 C243 1.444(13) . ? 
C241 C242 1.499(11) . ? 
C241 C244 1.588(13) . ? 
C242 H24A 0.9800 . ? 
C242 H24B 0.9800 . ? 
C242 H24C 0.9800 . ? 
C243 H24D 0.9800 . ? 
C243 H24E 0.9800 . ? 
C243 H24F 0.9800 . ? 
C244 H24G 0.9800 . ? 
C244 H24H 0.9800 . ? 
C244 H24I 0.9800 . ? 
Ga31 N31 1.978(5) . ? 
Ga31 N33 1.981(5) . ? 
Ga31 Cl31 2.172(2) . ? 
Ga31 Cl32 2.175(2) . ? 
Ga31 Ga32 2.8995(10) . ? 
Ga32 N34 1.858(5) . ? 
Ga32 N32 1.865(5) . ? 
Ga32 N33 2.040(5) . ? 
Ga32 N31 2.046(5) . ? 
N31 C31 1.468(9) . ? 
N31 C311 1.521(9) . ? 
N32 C32 1.375(9) . ? 
N32 C321 1.471(8) . ? 
N33 C33 1.463(9) . ? 
N33 C331 1.524(8) . ? 
N34 C34 1.383(9) . ? 
N34 C341 1.468(9) . ? 
C31 C32 1.324(10) . ? 
C31 H31 0.90(8) . ? 
C32 H32 0.97(6) . ? 
C33 C34 1.339(10) . ? 
C33 H33 0.90(8) . ? 
C34 H34 0.91(7) . ? 
C311 C314 1.513(10) . ? 
C311 C312 1.521(10) . ? 
C311 C313 1.541(10) . ? 
C312 H31A 0.9800 . ? 
C312 H31B 0.9800 . ? 
C312 H31C 0.9800 . ? 
C313 H31D 0.9800 . ? 
C313 H31E 0.9800 . ? 
C313 H31F 0.9800 . ? 
C314 H31G 0.9800 . ? 
C314 H31H 0.9800 . ? 
C314 H31I 0.9800 . ? 
C321 C322 1.506(10) . ? 
C321 C323 1.512(11) . ? 
C321 C324 1.536(9) . ? 
C322 H32A 0.9800 . ? 
C322 H32B 0.9800 . ? 
C322 H32C 0.9800 . ? 
C323 H32D 0.9800 . ? 
C323 H32E 0.9800 . ? 
C323 H32F 0.9800 . ? 
C324 H32G 0.9800 . ? 
C324 H32H 0.9800 . ? 
C324 H32I 0.9800 . ? 
C331 C332 1.517(9) . ? 
C331 C333 1.520(10) . ? 
C331 C334 1.522(9) . ? 
C332 H33A 0.9800 . ? 
C332 H33B 0.9800 . ? 
C332 H33C 0.9800 . ? 
C333 H33D 0.9800 . ? 
C333 H33E 0.9800 . ? 
C333 H33F 0.9800 . ? 
C334 H33G 0.9800 . ? 
C334 H33H 0.9800 . ? 
C334 H33I 0.9800 . ? 
C341 C344 1.524(11) . ? 
C341 C342 1.531(10) . ? 
C341 C343 1.540(11) . ? 
C342 H34A 0.9800 . ? 
C342 H34B 0.9800 . ? 
C342 H34C 0.9800 . ? 
C343 H34D 0.9800 . ? 
C343 H34E 0.9800 . ? 
C343 H34F 0.9800 . ? 
C344 H34G 0.9800 . ? 
C344 H34H 0.9800 . ? 
C344 H34I 0.9800 . ? 
Ga41 N41 1.958(6) . ? 
Ga41 N41 1.958(6) 2 ? 
Ga41 Cl4 2.168(3) 2 ? 
Ga41 Cl4 2.168(3) . ? 
Ga41 Ga42 2.8829(16) . ? 
Ga42 N42 1.842(6) . ? 
Ga42 N42 1.842(6) 2 ? 
Ga42 N41 2.037(6) . ? 
Ga42 N41 2.037(6) 2 ? 
N41 C411 1.493(10) . ? 
N41 C41 1.506(10) . ? 
N42 C42 1.404(10) . ? 
N42 C421 1.479(11) . ? 
C41 C42 1.330(11) . ? 
C41 H41 0.9500 . ? 
C42 H42 0.9500 . ? 
C411 C414 1.509(13) . ? 
C411 C413 1.551(13) . ? 
C411 C412 1.563(14) . ? 
C412 H41A 0.9800 . ? 
C412 H41B 0.9800 . ? 
C412 H41C 0.9800 . ? 
C413 H41D 0.9800 . ? 
C413 H41E 0.9800 . ? 
C413 H41F 0.9800 . ? 
C414 H41G 0.9800 . ? 
C414 H41H 0.9800 . ? 
C414 H41I 0.9800 . ? 
C421 C422 1.501(13) . ? 
C421 C423 1.523(15) . ? 
C421 C424 1.545(15) . ? 
C422 H42A 0.9800 . ? 
C422 H42B 0.9800 . ? 
C422 H42C 0.9800 . ? 
C424 H42D 0.9800 . ? 
C424 H42E 0.9800 . ? 
C424 H42F 0.9800 . ? 
C423 H42G 0.9800 . ? 
C423 H42H 0.9800 . ? 
C423 H42I 0.9800 . ? 
 
loop_ 
 _geom_angle_atom_site_label_1 
 _geom_angle_atom_site_label_2 
 _geom_angle_atom_site_label_3 
 _geom_angle 
 _geom_angle_site_symmetry_1 
 _geom_angle_site_symmetry_3 
 _geom_angle_publ_flag 
N13 Ga11 N11 89.3(2) . . ? 
N13 Ga11 Cl12 120.83(16) . . ? 
N11 Ga11 Cl12 110.86(16) . . ? 
N13 Ga11 Cl11 110.55(16) . . ? 
N11 Ga11 Cl11 121.15(15) . . ? 
Cl12 Ga11 Cl11 104.80(9) . . ? 
N13 Ga11 Ga12 44.41(15) . . ? 
N11 Ga11 Ga12 44.87(14) . . ? 
Cl12 Ga11 Ga12 128.46(7) . . ? 
Cl11 Ga11 Ga12 126.75(7) . . ? 
N14 Ga12 N12 138.8(2) . . ? 
N14 Ga12 N13 92.2(2) . . ? 
N12 Ga12 N13 118.2(2) . . ? 
N14 Ga12 N11 119.2(2) . . ? 
N12 Ga12 N11 91.7(2) . . ? 
N13 Ga12 N11 86.0(2) . . ? 
N14 Ga12 Ga11 110.39(17) . . ? 
N12 Ga12 Ga11 110.80(16) . . ? 
N13 Ga12 Ga11 42.98(14) . . ? 
N11 Ga12 Ga11 43.02(14) . . ? 
C11 N11 C111 111.9(5) . . ? 
C11 N11 Ga11 107.4(4) . . ? 
C111 N11 Ga11 120.5(4) . . ? 
C11 N11 Ga12 98.9(4) . . ? 
C111 N11 Ga12 122.7(4) . . ? 
Ga11 N11 Ga12 92.1(2) . . ? 
C12 N12 C121 119.9(5) . . ? 
C12 N12 Ga12 105.1(4) . . ? 
C121 N12 Ga12 134.6(4) . . ? 
C13 N13 C131 111.3(5) . . ? 
C13 N13 Ga11 107.6(4) . . ? 
C131 N13 Ga11 119.8(4) . . ? 
C13 N13 Ga12 98.7(4) . . ? 
C131 N13 Ga12 123.6(4) . . ? 
Ga11 N13 Ga12 92.6(2) . . ? 
C14 N14 C141 119.8(6) . . ? 
C14 N14 Ga12 105.6(4) . . ? 
C141 N14 Ga12 134.1(4) . . ? 
C12 C11 N11 119.1(6) . . ? 
C12 C11 H11 126(3) . . ? 
N11 C11 H11 115(3) . . ? 
C11 C12 N12 123.6(6) . . ? 
C11 C12 H12 121(4) . . ? 
N12 C12 H12 115(4) . . ? 
C14 C13 N13 118.5(6) . . ? 
C14 C13 H13 129(3) . . ? 
N13 C13 H13 112(3) . . ? 
C13 C14 N14 123.7(7) . . ? 
C13 C14 H14 121(6) . . ? 
N14 C14 H14 115(6) . . ? 
N11 C111 C112 108.6(5) . . ? 
N11 C111 C114 110.8(5) . . ? 
C112 C111 C114 110.1(6) . . ? 
N11 C111 C113 109.2(5) . . ? 
C112 C111 C113 109.3(6) . . ? 
C114 C111 C113 108.9(6) . . ? 
C111 C112 H11A 109.5 . . ? 
C111 C112 H11B 109.5 . . ? 
H11A C112 H11B 109.5 . . ? 
C111 C112 H11C 109.5 . . ? 
H11A C112 H11C 109.5 . . ? 
H11B C112 H11C 109.5 . . ? 
C111 C113 H11D 109.5 . . ? 
C111 C113 H11E 109.5 . . ? 
H11D C113 H11E 109.5 . . ? 
C111 C113 H11F 109.5 . . ? 
H11D C113 H11F 109.5 . . ? 
H11E C113 H11F 109.5 . . ? 
C111 C114 H11G 109.5 . . ? 
C111 C114 H11H 109.5 . . ? 
H11G C114 H11H 109.5 . . ? 
C111 C114 H11I 109.5 . . ? 
H11G C114 H11I 109.5 . . ? 
H11H C114 H11I 109.5 . . ? 
N12 C121 C123 108.8(5) . . ? 
N12 C121 C122 110.3(6) . . ? 
C123 C121 C122 110.6(7) . . ? 
N12 C121 C124 110.1(6) . . ? 
C123 C121 C124 107.8(7) . . ? 
C122 C121 C124 109.1(6) . . ? 
C121 C122 H12A 109.5 . . ? 
C121 C122 H12B 109.5 . . ? 
H12A C122 H12B 109.5 . . ? 
C121 C122 H12C 109.5 . . ? 
H12A C122 H12C 109.5 . . ? 
H12B C122 H12C 109.5 . . ? 
C121 C123 H12D 109.5 . . ? 
C121 C123 H12E 109.5 . . ? 
H12D C123 H12E 109.5 . . ? 
C121 C123 H12F 109.5 . . ? 
H12D C123 H12F 109.5 . . ? 
H12E C123 H12F 109.5 . . ? 
C121 C124 H12G 109.5 . . ? 
C121 C124 H12H 109.5 . . ? 
H12G C124 H12H 109.5 . . ? 
C121 C124 H12I 109.5 . . ? 
H12G C124 H12I 109.5 . . ? 
H12H C124 H12I 109.5 . . ? 
C133 C131 C132 109.7(6) . . ? 
C133 C131 N13 108.5(6) . . ? 
C132 C131 N13 108.5(5) . . ? 
C133 C131 C134 110.3(6) . . ? 
C132 C131 C134 110.4(6) . . ? 
N13 C131 C134 109.4(6) . . ? 
C131 C132 H13A 109.5 . . ? 
C131 C132 H13B 109.5 . . ? 
H13A C132 H13B 109.5 . . ? 
C131 C132 H13C 109.5 . . ? 
H13A C132 H13C 109.5 . . ? 
H13B C132 H13C 109.5 . . ? 
C131 C133 H13D 109.5 . . ? 
C131 C133 H13E 109.5 . . ? 
H13D C133 H13E 109.5 . . ? 
C131 C133 H13F 109.5 . . ? 
H13D C133 H13F 109.5 . . ? 
H13E C133 H13F 109.5 . . ? 
C131 C134 H13G 109.5 . . ? 
C131 C134 H13H 109.5 . . ? 
H13G C134 H13H 109.5 . . ? 
C131 C134 H13I 109.5 . . ? 
H13G C134 H13I 109.5 . . ? 
H13H C134 H13I 109.5 . . ? 
N14 C141 C144 107.7(5) . . ? 
N14 C141 C142 110.4(6) . . ? 
C144 C141 C142 111.0(7) . . ? 
N14 C141 C143 111.1(6) . . ? 
C144 C141 C143 107.8(7) . . ? 
C142 C141 C143 108.8(6) . . ? 
C141 C142 H14A 109.5 . . ? 
C141 C142 H14B 109.5 . . ? 
H14A C142 H14B 109.5 . . ? 
C141 C142 H14C 109.5 . . ? 
H14A C142 H14C 109.5 . . ? 
H14B C142 H14C 109.5 . . ? 
C141 C143 H14D 109.5 . . ? 
C141 C143 H14E 109.5 . . ? 
H14D C143 H14E 109.5 . . ? 
C141 C143 H14F 109.5 . . ? 
H14D C143 H14F 109.5 . . ? 
H14E C143 H14F 109.5 . . ? 
C141 C144 H14G 109.5 . . ? 
C141 C144 H14H 109.5 . . ? 
H14G C144 H14H 109.5 . . ? 
C141 C144 H14I 109.5 . . ? 
H14G C144 H14I 109.5 . . ? 
H14H C144 H14I 109.5 . . ? 
N23 Ga21 N21 89.4(2) . . ? 
N23 Ga21 Cl22 113.9(2) . . ? 
N21 Ga21 Cl22 119.7(2) . . ? 
N23 Ga21 Cl21 117.9(2) . . ? 
N21 Ga21 Cl21 112.5(2) . . ? 
Cl22 Ga21 Cl21 103.94(10) . . ? 
N23 Ga21 Ga22 44.33(16) . . ? 
N21 Ga21 Ga22 45.10(18) . . ? 
Cl22 Ga21 Ga22 129.67(8) . . ? 
Cl21 Ga21 Ga22 126.38(7) . . ? 
N24 Ga22 N22 139.1(3) . . ? 
N24 Ga22 N23 96.6(3) . . ? 
N22 Ga22 N23 114.6(3) . . ? 
N24 Ga22 N21 113.8(3) . . ? 
N22 Ga22 N21 95.1(3) . . ? 
N23 Ga22 N21 85.5(2) . . ? 
N24 Ga22 Ga21 110.89(19) . . ? 
N22 Ga22 Ga21 110.0(2) . . ? 
N23 Ga22 Ga21 42.08(17) . . ? 
N21 Ga22 Ga21 43.46(18) . . ? 
C211 N21 C21 101.2(7) . . ? 
C211 N21 Ga21 123.4(5) . . ? 
C21 N21 Ga21 106.7(5) . . ? 
C211 N21 Ga22 130.0(5) . . ? 
C21 N21 Ga22 101.0(5) . . ? 
Ga21 N21 Ga22 91.4(3) . . ? 
C221 N22 C22 114.8(6) . . ? 
C221 N22 Ga22 136.8(5) . . ? 
C22 N22 Ga22 105.3(5) . . ? 
C231 N23 C23 107.5(8) . . ? 
C231 N23 Ga21 124.2(6) . . ? 
C23 N23 Ga21 102.3(5) . . ? 
C231 N23 Ga22 126.9(6) . . ? 
C23 N23 Ga22 97.4(5) . . ? 
Ga21 N23 Ga22 93.6(3) . . ? 
C24 N24 C241 117.3(6) . . ? 
C24 N24 Ga22 103.0(5) . . ? 
C241 N24 Ga22 137.1(5) . . ? 
C22 C21 N21 111.3(8) . . ? 
C22 C21 H21 124.3 . . ? 
N21 C21 H21 124.3 . . ? 
C21 C22 N22 126.6(8) . . ? 
C21 C22 H22 116.7 . . ? 
N22 C22 H22 116.7 . . ? 
C24 C23 N23 117.3(8) . . ? 
C24 C23 H23 121.3 . . ? 
N23 C23 H23 121.3 . . ? 
C23 C24 N24 124.0(9) . . ? 
C23 C24 H24 118.0 . . ? 
N24 C24 H24 118.0 . . ? 
N21 C211 C213 114.7(8) . . ? 
N21 C211 C214 111.9(7) . . ? 
C213 C211 C214 113.0(7) . . ? 
N21 C211 C212 100.3(7) . . ? 
C213 C211 C212 108.2(8) . . ? 
C214 C211 C212 107.7(8) . . ? 
C211 C212 H21A 109.5 . . ? 
C211 C212 H21B 109.5 . . ? 
H21A C212 H21B 109.5 . . ? 
C211 C212 H21C 109.5 . . ? 
H21A C212 H21C 109.5 . . ? 
H21B C212 H21C 109.5 . . ? 
C211 C213 H21D 109.5 . . ? 
C211 C213 H21E 109.5 . . ? 
H21D C213 H21E 109.5 . . ? 
C211 C213 H21F 109.5 . . ? 
H21D C213 H21F 109.5 . . ? 
H21E C213 H21F 109.5 . . ? 
C211 C214 H21G 109.5 . . ? 
C211 C214 H21H 109.5 . . ? 
H21G C214 H21H 109.5 . . ? 
C211 C214 H21I 109.5 . . ? 
H21G C214 H21I 109.5 . . ? 
H21H C214 H21I 109.5 . . ? 
N22 C221 C224 111.8(8) . . ? 
N22 C221 C223 104.7(7) . . ? 
C224 C221 C223 112.0(10) . . ? 
N22 C221 C222 111.8(8) . . ? 
C224 C221 C222 110.5(8) . . ? 
C223 C221 C222 105.8(7) . . ? 
C221 C222 H22A 109.5 . . ? 
C221 C222 H22B 109.5 . . ? 
H22A C222 H22B 109.5 . . ? 
C221 C222 H22C 109.5 . . ? 
H22A C222 H22C 109.5 . . ? 
H22B C222 H22C 109.5 . . ? 
C221 C223 H22D 109.5 . . ? 
C221 C223 H22E 109.5 . . ? 
H22D C223 H22E 109.5 . . ? 
C221 C223 H22F 109.5 . . ? 
H22D C223 H22F 109.5 . . ? 
H22E C223 H22F 109.5 . . ? 
C221 C224 H22G 109.5 . . ? 
C221 C224 H22H 109.5 . . ? 
H22G C224 H22H 109.5 . . ? 
C221 C224 H22I 109.5 . . ? 
H22G C224 H22I 109.5 . . ? 
H22H C224 H22I 109.5 . . ? 
N23 C231 C234 110.6(8) . . ? 
N23 C231 C233 100.0(8) . . ? 
C234 C231 C233 114.3(10) . . ? 
N23 C231 C232 112.8(9) . . ? 
C234 C231 C232 107.1(8) . . ? 
C233 C231 C232 112.1(9) . . ? 
C231 C232 H23A 109.5 . . ? 
C231 C232 H23B 109.5 . . ? 
H23A C232 H23B 109.5 . . ? 
C231 C232 H23C 109.5 . . ? 
H23A C232 H23C 109.5 . . ? 
H23B C232 H23C 109.5 . . ? 
C231 C233 H23D 109.5 . . ? 
C231 C233 H23E 109.5 . . ? 
H23D C233 H23E 109.5 . . ? 
C231 C233 H23F 109.5 . . ? 
H23D C233 H23F 109.5 . . ? 
H23E C233 H23F 109.5 . . ? 
C231 C234 H23G 109.5 . . ? 
C231 C234 H23H 109.5 . . ? 
H23G C234 H23H 109.5 . . ? 
C231 C234 H23I 109.5 . . ? 
H23G C234 H23I 109.5 . . ? 
H23H C234 H23I 109.5 . . ? 
C243 C241 N24 112.1(8) . . ? 
C243 C241 C242 109.8(9) . . ? 
N24 C241 C242 109.2(7) . . ? 
C243 C241 C244 111.7(10) . . ? 
N24 C241 C244 107.2(7) . . ? 
C242 C241 C244 106.6(8) . . ? 
C241 C242 H24A 109.5 . . ? 
C241 C242 H24B 109.5 . . ? 
H24A C242 H24B 109.5 . . ? 
C241 C242 H24C 109.5 . . ? 
H24A C242 H24C 109.5 . . ? 
H24B C242 H24C 109.5 . . ? 
C241 C243 H24D 109.5 . . ? 
C241 C243 H24E 109.5 . . ? 
H24D C243 H24E 109.5 . . ? 
C241 C243 H24F 109.5 . . ? 
H24D C243 H24F 109.5 . . ? 
H24E C243 H24F 109.5 . . ? 
C241 C244 H24G 109.5 . . ? 
C241 C244 H24H 109.5 . . ? 
H24G C244 H24H 109.5 . . ? 
C241 C244 H24I 109.5 . . ? 
H24G C244 H24I 109.5 . . ? 
H24H C244 H24I 109.5 . . ? 
N31 Ga31 N33 89.5(2) . . ? 
N31 Ga31 Cl31 119.58(17) . . ? 
N33 Ga31 Cl31 111.91(16) . . ? 
N31 Ga31 Cl32 111.55(17) . . ? 
N33 Ga31 Cl32 119.83(17) . . ? 
Cl31 Ga31 Cl32 104.89(8) . . ? 
N31 Ga31 Ga32 44.84(15) . . ? 
N33 Ga31 Ga32 44.68(15) . . ? 
Cl31 Ga31 Ga32 128.19(6) . . ? 
Cl32 Ga31 Ga32 126.93(6) . . ? 
N34 Ga32 N32 139.8(2) . . ? 
N34 Ga32 N33 91.5(2) . . ? 
N32 Ga32 N33 119.0(2) . . ? 
N34 Ga32 N31 118.1(2) . . ? 
N32 Ga32 N31 91.3(2) . . ? 
N33 Ga32 N31 86.0(2) . . ? 
N34 Ga32 Ga31 110.41(18) . . ? 
N32 Ga32 Ga31 109.77(17) . . ? 
N33 Ga32 Ga31 43.04(14) . . ? 
N31 Ga32 Ga31 42.98(15) . . ? 
C31 N31 C311 111.1(5) . . ? 
C31 N31 Ga31 107.6(4) . . ? 
C311 N31 Ga31 121.2(4) . . ? 
C31 N31 Ga32 99.0(4) . . ? 
C311 N31 Ga32 122.5(4) . . ? 
Ga31 N31 Ga32 92.2(2) . . ? 
C32 N32 C321 118.8(6) . . ? 
C32 N32 Ga32 106.0(5) . . ? 
C321 N32 Ga32 134.2(5) . . ? 
C33 N33 C331 110.7(5) . . ? 
C33 N33 Ga31 107.3(4) . . ? 
C331 N33 Ga31 120.6(4) . . ? 
C33 N33 Ga32 99.3(4) . . ? 
C331 N33 Ga32 123.5(4) . . ? 
Ga31 N33 Ga32 92.3(2) . . ? 
C34 N34 C341 119.6(6) . . ? 
C34 N34 Ga32 106.1(5) . . ? 
C341 N34 Ga32 134.1(5) . . ? 
C32 C31 N31 119.7(7) . . ? 
C32 C31 H31 121(5) . . ? 
N31 C31 H31 120(5) . . ? 
C31 C32 N32 122.8(7) . . ? 
C31 C32 H32 120(4) . . ? 
N32 C32 H32 117(4) . . ? 
C34 C33 N33 119.4(7) . . ? 
C34 C33 H33 112(5) . . ? 
N33 C33 H33 128(5) . . ? 
C33 C34 N34 122.1(7) . . ? 
C33 C34 H34 120(4) . . ? 
N34 C34 H34 117(4) . . ? 
C314 C311 C312 110.0(7) . . ? 
C314 C311 N31 110.6(6) . . ? 
C312 C311 N31 108.7(5) . . ? 
C314 C311 C313 109.6(6) . . ? 
C312 C311 C313 110.0(7) . . ? 
N31 C311 C313 107.9(6) . . ? 
C311 C312 H31A 109.5 . . ? 
C311 C312 H31B 109.5 . . ? 
H31A C312 H31B 109.5 . . ? 
C311 C312 H31C 109.5 . . ? 
H31A C312 H31C 109.5 . . ? 
H31B C312 H31C 109.5 . . ? 
C311 C313 H31D 109.5 . . ? 
C311 C313 H31E 109.5 . . ? 
H31D C313 H31E 109.5 . . ? 
C311 C313 H31F 109.5 . . ? 
H31D C313 H31F 109.5 . . ? 
H31E C313 H31F 109.5 . . ? 
C311 C314 H31G 109.5 . . ? 
C311 C314 H31H 109.5 . . ? 
H31G C314 H31H 109.5 . . ? 
C311 C314 H31I 109.5 . . ? 
H31G C314 H31I 109.5 . . ? 
H31H C314 H31I 109.5 . . ? 
N32 C321 C322 108.9(6) . . ? 
N32 C321 C323 111.5(6) . . ? 
C322 C321 C323 108.7(7) . . ? 
N32 C321 C324 109.2(6) . . ? 
C322 C321 C324 109.3(6) . . ? 
C323 C321 C324 109.2(7) . . ? 
C321 C322 H32A 109.5 . . ? 
C321 C322 H32B 109.5 . . ? 
H32A C322 H32B 109.5 . . ? 
C321 C322 H32C 109.5 . . ? 
H32A C322 H32C 109.5 . . ? 
H32B C322 H32C 109.5 . . ? 
C321 C323 H32D 109.5 . . ? 
C321 C323 H32E 109.5 . . ? 
H32D C323 H32E 109.5 . . ? 
C321 C323 H32F 109.5 . . ? 
H32D C323 H32F 109.5 . . ? 
H32E C323 H32F 109.5 . . ? 
C321 C324 H32G 109.5 . . ? 
C321 C324 H32H 109.5 . . ? 
H32G C324 H32H 109.5 . . ? 
C321 C324 H32I 109.5 . . ? 
H32G C324 H32I 109.5 . . ? 
H32H C324 H32I 109.5 . . ? 
C332 C331 C333 109.5(6) . . ? 
C332 C331 C334 109.4(6) . . ? 
C333 C331 C334 110.4(6) . . ? 
C332 C331 N33 108.5(5) . . ? 
C333 C331 N33 108.2(6) . . ? 
C334 C331 N33 110.9(6) . . ? 
C331 C332 H33A 109.5 . . ? 
C331 C332 H33B 109.5 . . ? 
H33A C332 H33B 109.5 . . ? 
C331 C332 H33C 109.5 . . ? 
H33A C332 H33C 109.5 . . ? 
H33B C332 H33C 109.5 . . ? 
C331 C333 H33D 109.5 . . ? 
C331 C333 H33E 109.5 . . ? 
H33D C333 H33E 109.5 . . ? 
C331 C333 H33F 109.5 . . ? 
H33D C333 H33F 109.5 . . ? 
H33E C333 H33F 109.5 . . ? 
C331 C334 H33G 109.5 . . ? 
C331 C334 H33H 109.5 . . ? 
H33G C334 H33H 109.5 . . ? 
C331 C334 H33I 109.5 . . ? 
H33G C334 H33I 109.5 . . ? 
H33H C334 H33I 109.5 . . ? 
N34 C341 C344 112.4(7) . . ? 
N34 C341 C342 107.9(6) . . ? 
C344 C341 C342 108.4(7) . . ? 
N34 C341 C343 109.9(7) . . ? 
C344 C341 C343 109.4(7) . . ? 
C342 C341 C343 108.8(7) . . ? 
C341 C342 H34A 109.5 . . ? 
C341 C342 H34B 109.5 . . ? 
H34A C342 H34B 109.5 . . ? 
C341 C342 H34C 109.5 . . ? 
H34A C342 H34C 109.5 . . ? 
H34B C342 H34C 109.5 . . ? 
C341 C343 H34D 109.5 . . ? 
C341 C343 H34E 109.5 . . ? 
H34D C343 H34E 109.5 . . ? 
C341 C343 H34F 109.5 . . ? 
H34D C343 H34F 109.5 . . ? 
H34E C343 H34F 109.5 . . ? 
C341 C344 H34G 109.5 . . ? 
C341 C344 H34H 109.5 . . ? 
H34G C344 H34H 109.5 . . ? 
C341 C344 H34I 109.5 . . ? 
H34G C344 H34I 109.5 . . ? 
H34H C344 H34I 109.5 . . ? 
N41 Ga41 N41 89.8(3) . 2 ? 
N41 Ga41 Cl4 120.2(2) . 2 ? 
N41 Ga41 Cl4 110.6(2) 2 2 ? 
N41 Ga41 Cl4 110.6(2) . . ? 
N41 Ga41 Cl4 120.2(2) 2 . ? 
Cl4 Ga41 Cl4 105.8(2) 2 . ? 
N41 Ga41 Ga42 44.92(16) . . ? 
N41 Ga41 Ga42 44.92(16) 2 . ? 
Cl4 Ga41 Ga42 127.08(10) 2 . ? 
Cl4 Ga41 Ga42 127.08(10) . . ? 
N42 Ga42 N42 139.3(4) . 2 ? 
N42 Ga42 N41 93.3(3) . . ? 
N42 Ga42 N41 116.9(3) 2 . ? 
N42 Ga42 N41 116.9(3) . 2 ? 
N42 Ga42 N41 93.3(3) 2 2 ? 
N41 Ga42 N41 85.4(3) . 2 ? 
N42 Ga42 Ga41 110.4(2) . . ? 
N42 Ga42 Ga41 110.4(2) 2 . ? 
N41 Ga42 Ga41 42.72(16) . . ? 
N41 Ga42 Ga41 42.72(16) 2 . ? 
C411 N41 C41 109.1(7) . . ? 
C411 N41 Ga41 120.5(5) . . ? 
C41 N41 Ga41 107.3(5) . . ? 
C411 N41 Ga42 125.4(5) . . ? 
C41 N41 Ga42 99.1(4) . . ? 
Ga41 N41 Ga42 92.4(2) . . ? 
C42 N42 C421 119.6(7) . . ? 
C42 N42 Ga42 104.6(6) . . ? 
C421 N42 Ga42 135.4(6) . . ? 
C42 C41 N41 117.1(7) . . ? 
C42 C41 H41 121.5 . . ? 
N41 C41 H41 121.5 . . ? 
C41 C42 N42 124.8(8) . . ? 
C41 C42 H42 117.6 . . ? 
N42 C42 H42 117.6 . . ? 
N41 C411 C414 110.8(9) . . ? 
N41 C411 C413 110.2(8) . . ? 
C414 C411 C413 108.3(8) . . ? 
N41 C411 C412 106.0(8) . . ? 
C414 C411 C412 110.4(9) . . ? 
C413 C411 C412 111.1(10) . . ? 
C411 C412 H41A 109.5 . . ? 
C411 C412 H41B 109.5 . . ? 
H41A C412 H41B 109.5 . . ? 
C411 C412 H41C 109.5 . . ? 
H41A C412 H41C 109.5 . . ? 
H41B C412 H41C 109.5 . . ? 
C411 C413 H41D 109.5 . . ? 
C411 C413 H41E 109.5 . . ? 
H41D C413 H41E 109.5 . . ? 
C411 C413 H41F 109.5 . . ? 
H41D C413 H41F 109.5 . . ? 
H41E C413 H41F 109.5 . . ? 
C411 C414 H41G 109.5 . . ? 
C411 C414 H41H 109.5 . . ? 
H41G C414 H41H 109.5 . . ? 
C411 C414 H41I 109.5 . . ? 
H41G C414 H41I 109.5 . . ? 
H41H C414 H41I 109.5 . . ? 
N42 C421 C422 108.2(8) . . ? 
N42 C421 C423 112.3(9) . . ? 
C422 C421 C423 110.0(10) . . ? 
N42 C421 C424 108.9(9) . . ? 
C422 C421 C424 110.1(9) . . ? 
C423 C421 C424 107.3(9) . . ? 
C421 C422 H42A 109.5 . . ? 
C421 C422 H42B 109.5 . . ? 
H42A C422 H42B 109.5 . . ? 
C421 C422 H42C 109.5 . . ? 
H42A C422 H42C 109.5 . . ? 
H42B C422 H42C 109.5 . . ? 
C421 C424 H42D 109.5 . . ? 
C421 C424 H42E 109.5 . . ? 
H42D C424 H42E 109.5 . . ? 
C421 C424 H42F 109.5 . . ? 
H42D C424 H42F 109.5 . . ? 
H42E C424 H42F 109.5 . . ? 
C421 C423 H42G 109.5 . . ? 
C421 C423 H42H 109.5 . . ? 
H42G C423 H42H 109.5 . . ? 
C421 C423 H42I 109.5 . . ? 
H42G C423 H42I 109.5 . . ? 
H42H C423 H42I 109.5 . . ? 
 
_diffrn_measured_fraction_theta_max    0.997 
_diffrn_reflns_theta_full              24.98 
_diffrn_measured_fraction_theta_full   0.997 
_refine_diff_density_max    1.300 
_refine_diff_density_min   -0.887 
_refine_diff_density_rms    0.100 
 
data_compound_3 
 
_audit_creation_method            SHELXL-97 
_chemical_name_systematic 
; 
 ? 
; 
_chemical_name_common             ? 
_chemical_melting_point           ? 
_chemical_formula_moiety          ? 
_chemical_formula_sum 
 'C30 H60 Ga K N2 O8' 
_chemical_formula_weight          685.62 
 
loop_ 
 _atom_type_symbol 
 _atom_type_description 
 _atom_type_scat_dispersion_real 
 _atom_type_scat_dispersion_imag 
 _atom_type_scat_source 
 'C'  'C'   0.0033   0.0016 
 'International Tables Vol C Tables 4.2.6.8 and 6.1.1.4' 
 'H'  'H'   0.0000   0.0000 
 'International Tables Vol C Tables 4.2.6.8 and 6.1.1.4' 
 'N'  'N'   0.0061   0.0033 
 'International Tables Vol C Tables 4.2.6.8 and 6.1.1.4' 
 'O'  'O'   0.0106   0.0060 
 'International Tables Vol C Tables 4.2.6.8 and 6.1.1.4' 
 'K'  'K'   0.2009   0.2494 
 'International Tables Vol C Tables 4.2.6.8 and 6.1.1.4' 
 'Ga'  'Ga'   0.2307   1.6083 
 'International Tables Vol C Tables 4.2.6.8 and 6.1.1.4' 
 
_symmetry_cell_setting            triclinic 
_symmetry_space_group_name_H-M    P-1 
 
loop_ 
 _symmetry_equiv_pos_as_xyz 
 'x, y, z' 
 '-x, -y, -z' 
 
_cell_length_a                    9.718(2) 
_cell_length_b                    10.116(2) 
_cell_length_c                    10.318(2) 
_cell_angle_alpha                 77.67(2) 
_cell_angle_beta                  69.64(2) 
_cell_angle_gamma                 88.51(2) 
_cell_volume                      927.7(3) 
_cell_formula_units_Z             1 
_cell_measurement_temperature     143(2) 
_cell_measurement_reflns_used     25 
_cell_measurement_theta_min       13 
_cell_measurement_theta_max       16 
 
_exptl_crystal_description        transparent block 
_exptl_crystal_colour             yellow 
_exptl_crystal_size_max           0.4 
_exptl_crystal_size_mid           0.3 
_exptl_crystal_size_min           0.3 
_exptl_crystal_density_meas       ? 
_exptl_crystal_density_diffrn     1.227 
_exptl_crystal_density_method     'not measured' 
_exptl_crystal_F_000              368 
_exptl_absorpt_coefficient_mu     0.898 
_exptl_absorpt_correction_type    no 
_exptl_absorpt_correction_T_min   ? 
_exptl_absorpt_correction_T_max   ? 
_exptl_absorpt_process_details    ? 
 
_exptl_special_details 
; 
 ? 
; 
 
_diffrn_ambient_temperature       143(2) 
_diffrn_radiation_wavelength      0.71073 
_diffrn_radiation_type            MoK\a 
_diffrn_radiation_source          'fine-focus sealed tube' 
_diffrn_radiation_monochromator   graphite 
_diffrn_measurement_device_type   Enraf-Nonius CAD4 
_diffrn_measurement_method        ? 
_diffrn_detector_area_resol_mean  ? 
_diffrn_standards_number          -2 -3 1/2 3 -1/1 4 4 
_diffrn_standards_interval_count  ? 
_diffrn_standards_interval_time   ? 
_diffrn_standards_decay_%         cadshel 
_diffrn_reflns_number             8192 
_diffrn_reflns_av_R_equivalents   0.0347 
_diffrn_reflns_av_sigmaI/netI     0.0472 
_diffrn_reflns_limit_h_min        -12 
_diffrn_reflns_limit_h_max        12 
_diffrn_reflns_limit_k_min        -13 
_diffrn_reflns_limit_k_max        13 
_diffrn_reflns_limit_l_min        -14 
_diffrn_reflns_limit_l_max        13 
_diffrn_reflns_theta_min          2.16 
_diffrn_reflns_theta_max          28.99 
_reflns_number_total              4122 
_reflns_number_gt                 2838 
_reflns_threshold_expression      >2sigma(I) 
 
_computing_data_collection        'CAD4 Software (Enraf-Nonius 1989)' 
_computing_cell_refinement        'CAD4 Software (Enraf-Nonius 1989)' 
_computing_data_reduction         'SDP-PLUS (Enraf-Nonius 1988)' 
_computing_structure_solution     'SHELXS-97 (Sheldrick, 1997)' 
_computing_structure_refinement   'SHELXL-97 (Sheldrick, 1997)' 
_computing_molecular_graphics     'SHELXTL' 
_computing_publication_material   'local programs 
 
_refine_special_details 
; 
 Refinement of F^2^ against ALL reflections.  The weighted R-factor wR and 
 goodness of fit S are based on F^2^, conventional R-factors R are based 
 on F, with F set to zero for negative F^2^. The threshold expression of 
 F^2^ > 2sigma(F^2^) is used only for calculating R-factors(gt) etc. and is 
 not relevant to the choice of reflections for refinement.  R-factors based 
 on F^2^ are statistically about twice as large as those based on F, and R- 
 factors based on ALL data will be even larger. 
; 
 
_refine_ls_structure_factor_coef  Fsqd  
_refine_ls_matrix_type            full 
_refine_ls_weighting_scheme       calc  
_refine_ls_weighting_details 
 'calc w=1/[\s^2^(Fo^2^)+(0.0445P)^2^+0.0719P] where P=(Fo^2^+2Fc^2^)/3' 
_atom_sites_solution_primary      direct 
_atom_sites_solution_secondary    difmap 
_atom_sites_solution_hydrogens    geom 
_refine_ls_hydrogen_treatment     mixed 
_refine_ls_extinction_method      none 
_refine_ls_extinction_coef        ? 
_refine_ls_number_reflns          4122 
_refine_ls_number_parameters      315 
_refine_ls_number_restraints      72 
_refine_ls_R_factor_all           0.0717 
_refine_ls_R_factor_gt            0.0336 
_refine_ls_wR_factor_ref          0.0857 
_refine_ls_wR_factor_gt           0.0751 
_refine_ls_goodness_of_fit_ref    1.017 
_refine_ls_restrained_S_all       1.013 
_refine_ls_shift/su_max           0.000 
_refine_ls_shift/su_mean          0.000 
 
loop_ 
 _atom_site_label 
 _atom_site_type_symbol 
 _atom_site_fract_x 
 _atom_site_fract_y 
 _atom_site_fract_z 
 _atom_site_U_iso_or_equiv 
 _atom_site_adp_type 
 _atom_site_occupancy 
 _atom_site_symmetry_multiplicity 
 _atom_site_calc_flag 
 _atom_site_refinement_flags 
 _atom_site_disorder_assembly 
 _atom_site_disorder_group 
Ga Ga 0.46958(8) 0.06698(7) 0.11569(7) 0.02776(13) Uani 0.50 1 d PDU . . 
N1 N 0.4203(10) 0.0632(9) -0.0548(9) 0.0240(6) Uani 0.50 1 d PDU . . 
N2 N 0.4004(10) 0.0778(9) -0.0497(9) 0.0250(7) Uani 0.50 1 d PDU . . 
C1 C 0.4974(8) -0.0278(6) -0.1294(6) 0.0268(9) Uani 0.50 1 d PDU . . 
H1 H 0.484(4) -0.042(3) -0.218(4) 0.024(9) Uiso 0.50 1 d P . . 
C2 C 0.4103(4) 0.1043(4) 0.0712(3) 0.0250(6) Uani 0.50 1 d PDU . . 
H2 H 0.356(4) 0.162(3) 0.114(4) 0.021(8) Uiso 0.50 1 d P . . 
C31 C 0.3228(4) 0.1464(5) -0.1151(7) 0.0311(7) Uani 0.50 1 d PDU A 1 
C4 C 0.2485(5) 0.2425(4) -0.0172(4) 0.0565(10) Uani 0.54 1 d PDU A 1 
H4A H 0.1883 0.3037 -0.0597 0.085 Uiso 0.54 1 calc PR A 1 
H4B H 0.3239 0.2957 -0.0046 0.085 Uiso 0.54 1 calc PR A 1 
H4C H 0.1859 0.1893 0.0750 0.085 Uiso 0.54 1 calc PR A 1 
C5 C 0.4073(4) 0.2344(4) -0.2602(4) 0.0425(8) Uani 0.54 1 d PDU A 1 
H5A H 0.3389 0.2900 -0.2963 0.064 Uiso 0.54 1 calc PR A 1 
H5B H 0.4566 0.1764 -0.3257 0.064 Uiso 0.54 1 calc PR A 1 
H5C H 0.4808 0.2935 -0.2519 0.064 Uiso 0.54 1 calc PR A 1 
C6 C 0.2031(4) 0.0616(4) -0.1284(5) 0.0530(10) Uani 0.54 1 d PDU A 1 
H6A H 0.1439 0.1209 -0.1738 0.079 Uiso 0.54 1 calc PR A 1 
H6B H 0.1400 0.0134 -0.0339 0.079 Uiso 0.54 1 calc PR A 1 
H6C H 0.2484 -0.0042 -0.1859 0.079 Uiso 0.54 1 calc PR A 1 
C32 C 0.2993(4) 0.1546(5) -0.1102(7) 0.0315(7) Uani 0.50 1 d PDU A 2 
C7 C 0.2983(6) 0.0998(5) -0.2377(5) 0.0540(11) Uani 0.46 1 d PU A 2 
H7A H 0.3982 0.1072 -0.3073 0.081 Uiso 0.46 1 calc PR A 2 
H7B H 0.2335 0.1527 -0.2812 0.081 Uiso 0.46 1 calc PR A 2 
H7C H 0.2625 0.0046 -0.2059 0.081 Uiso 0.46 1 calc PR A 2 
C8 C 0.1430(4) 0.1414(5) -0.0035(4) 0.0481(10) Uani 0.46 1 d PU A 2 
H8A H 0.1417 0.1759 0.0788 0.072 Uiso 0.46 1 calc PR A 2 
H8B H 0.1083 0.0458 0.0272 0.072 Uiso 0.46 1 calc PR A 2 
H8C H 0.0786 0.1939 -0.0477 0.072 Uiso 0.46 1 calc PR A 2 
C9 C 0.3499(5) 0.3039(3) -0.1631(5) 0.0477(10) Uani 0.46 1 d PU A 2 
H9A H 0.3520 0.3414 -0.0837 0.071 Uiso 0.46 1 calc PR A 2 
H9B H 0.2816 0.3532 -0.2045 0.071 Uiso 0.46 1 calc PR A 2 
H9C H 0.4486 0.3132 -0.2351 0.071 Uiso 0.46 1 calc PR A 2 
K K 0.0000 0.5000 0.5000 0.02670(14) Uani 1 2 d S . . 
O1 O 0.22613(13) 0.64372(12) 0.26339(13) 0.0344(3) Uani 1 1 d . . . 
O2 O 0.22110(13) 0.35966(12) 0.33188(13) 0.0347(3) Uani 1 1 d . . . 
O3 O 0.02547(13) 0.22795(11) 0.60394(14) 0.0347(3) Uani 1 1 d . . . 
O4 O -0.16367(18) 0.43299(17) 0.35319(18) 0.0612(4) Uani 1 1 d . C . 
C11 C 0.1903(2) 0.7722(2) 0.1974(2) 0.0462(5) Uani 1 1 d . . . 
H111 H 0.128(2) 0.763(2) 0.144(2) 0.048(6) Uiso 1 1 d . . . 
H112 H 0.278(3) 0.820(2) 0.135(2) 0.051(6) Uiso 1 1 d . . . 
C12 C 0.3050(2) 0.5668(2) 0.1640(2) 0.0396(5) Uani 1 1 d . . . 
H121 H 0.390(2) 0.618(2) 0.094(2) 0.047(6) Uiso 1 1 d . . . 
H122 H 0.245(2) 0.543(2) 0.114(2) 0.036(5) Uiso 1 1 d . . . 
C13 C 0.3494(2) 0.4412(2) 0.2414(2) 0.0375(4) Uani 1 1 d . . . 
H131 H 0.403(2) 0.465(2) 0.299(2) 0.038(5) Uiso 1 1 d . . . 
H132 H 0.420(2) 0.389(2) 0.174(2) 0.047(6) Uiso 1 1 d . . . 
C14 C 0.2544(2) 0.2421(2) 0.4168(2) 0.0397(4) Uani 1 1 d . . . 
H141 H 0.300(2) 0.270(2) 0.478(2) 0.040(5) Uiso 1 1 d . . . 
H142 H 0.324(2) 0.193(2) 0.359(2) 0.047(6) Uiso 1 1 d . . . 
C15 C 0.1158(2) 0.15841(19) 0.5017(2) 0.0416(5) Uani 1 1 d . . . 
H151 H 0.065(2) 0.144(2) 0.440(2) 0.048(6) Uiso 1 1 d . . . 
H152 H 0.138(2) 0.068(2) 0.550(2) 0.048(6) Uiso 1 1 d . . . 
C16 C -0.1098(2) 0.15428(19) 0.6899(3) 0.0451(5) Uani 1 1 d . . . 
H161 H -0.089(2) 0.064(2) 0.733(2) 0.049(6) Uiso 1 1 d . . . 
H162 H -0.172(3) 0.147(2) 0.635(2) 0.050(6) Uiso 1 1 d . . . 
C41 C -0.3044(3) 0.3643(3) 0.4196(3) 0.0577(6) Uani 1 1 d . C . 
H41A H -0.3819 0.4259 0.4071 0.069 Uiso 1 1 calc R . . 
H41B H -0.3249 0.3307 0.5223 0.069 Uiso 1 1 calc R . . 
C42 C -0.3004(3) 0.2482(3) 0.3494(3) 0.0669(7) Uani 1 1 d . . . 
H42A H -0.3996 0.2187 0.3566 0.080 Uiso 1 1 calc R B 1 
H42B H -0.2515 0.1700 0.3871 0.080 Uiso 1 1 calc R B 1 
C43 C -0.2061(6) 0.3212(6) 0.1963(5) 0.0665(13) Uani 0.62 1 d P C 1 
H43A H -0.1592 0.2551 0.1381 0.080 Uiso 0.62 1 calc PR C 1 
H43B H -0.2663 0.3800 0.1499 0.080 Uiso 0.62 1 calc PR C 1 
C43' C -0.1646(9) 0.2551(8) 0.2327(9) 0.0617(19) Uani 0.38 1 d P C 2 
H43C H -0.1820 0.2480 0.1454 0.074 Uiso 0.38 1 calc PR C 2 
H43D H -0.1001 0.1827 0.2541 0.074 Uiso 0.38 1 calc PR C 2 
C44 C -0.0955(3) 0.4019(3) 0.2180(3) 0.0648(7) Uani 1 1 d . . . 
H44A H -0.0075 0.3495 0.2155 0.078 Uiso 1 1 calc R C 1 
H44B H -0.0652 0.4860 0.1433 0.078 Uiso 1 1 calc R C 1 
 
loop_ 
 _atom_site_aniso_label 
 _atom_site_aniso_U_11 
 _atom_site_aniso_U_22 
 _atom_site_aniso_U_33 
 _atom_site_aniso_U_23 
 _atom_site_aniso_U_13 
 _atom_site_aniso_U_12 
Ga 0.0329(4) 0.0255(4) 0.0229(2) -0.0078(3) -0.0058(2) 0.0004(2) 
N1 0.0240(19) 0.0209(18) 0.0248(12) -0.0034(9) -0.0068(14) -0.0012(11) 
N2 0.0254(19) 0.0213(17) 0.0259(12) -0.0031(9) -0.0070(13) -0.0001(10) 
C1 0.040(3) 0.016(3) 0.0266(17) -0.0054(19) -0.0136(18) 0.0001(12) 
C2 0.0260(18) 0.0180(16) 0.0295(14) -0.0084(13) -0.0059(11) -0.0002(11) 
C31 0.0255(19) 0.0272(19) 0.0368(13) 0.0006(11) -0.0108(12) -0.0008(10) 
C4 0.057(3) 0.054(2) 0.060(2) -0.0172(18) -0.0206(18) 0.0320(18) 
C5 0.047(2) 0.0345(18) 0.0411(14) 0.0097(11) -0.0198(13) -0.0068(14) 
C6 0.0356(19) 0.041(2) 0.084(3) 0.0092(17) -0.0354(19) -0.0078(14) 
C32 0.0327(16) 0.0222(15) 0.0363(19) 0.0019(13) -0.0129(13) -0.0004(12) 
C7 0.078(3) 0.049(2) 0.052(2) -0.011(2) -0.045(2) 0.014(3) 
C8 0.0251(14) 0.060(3) 0.052(2) 0.0102(19) -0.0171(14) 0.0014(15) 
C9 0.053(2) 0.0245(14) 0.061(3) 0.0116(15) -0.026(2) -0.0047(15) 
K 0.0276(3) 0.0184(2) 0.0302(3) -0.0038(2) -0.0059(2) -0.0036(2) 
O1 0.0313(7) 0.0300(6) 0.0332(7) 0.0023(5) -0.0056(5) -0.0029(5) 
O2 0.0295(6) 0.0327(7) 0.0391(7) -0.0044(5) -0.0104(5) 0.0004(5) 
O3 0.0339(7) 0.0191(6) 0.0459(7) -0.0016(5) -0.0103(6) -0.0040(5) 
O4 0.0558(10) 0.0706(11) 0.0702(11) -0.0306(9) -0.0286(9) -0.0079(8) 
C11 0.0375(11) 0.0348(11) 0.0492(13) 0.0171(9) -0.0088(10) -0.0083(9) 
C12 0.0306(10) 0.0493(12) 0.0312(10) -0.0031(9) -0.0039(8) -0.0084(9) 
C13 0.0266(9) 0.0441(11) 0.0394(11) -0.0147(9) -0.0051(8) -0.0002(8) 
C14 0.0417(11) 0.0370(11) 0.0420(11) -0.0118(9) -0.0157(9) 0.0136(9) 
C15 0.0514(12) 0.0242(9) 0.0525(12) -0.0101(9) -0.0214(10) 0.0053(8) 
C16 0.0367(11) 0.0215(9) 0.0673(15) 0.0085(9) -0.0160(10) -0.0091(8) 
C41 0.0469(13) 0.0659(15) 0.0715(16) -0.0300(13) -0.0263(12) 0.0090(11) 
C42 0.0553(15) 0.0657(16) 0.091(2) -0.0361(15) -0.0281(14) 0.0010(12) 
C43 0.075(3) 0.079(4) 0.061(3) -0.033(3) -0.033(2) 0.008(3) 
C43' 0.067(5) 0.054(5) 0.070(5) -0.027(4) -0.021(4) -0.004(4) 
C44 0.0665(17) 0.0701(17) 0.0562(15) -0.0155(13) -0.0177(13) -0.0060(13) 
 
_geom_special_details 
; 
 All esds (except the esd in the dihedral angle between two l.s. planes) 
 are estimated using the full covariance matrix.  The cell esds are taken 
 into account individually in the estimation of esds in distances, angles 
 and torsion angles; correlations between esds in cell parameters are only 
 used when they are defined by crystal symmetry.  An approximate (isotropic) 
 treatment of cell esds is used for estimating esds involving l.s. planes. 
; 
 
loop_ 
 _geom_bond_atom_site_label_1 
 _geom_bond_atom_site_label_2 
 _geom_bond_distance 
 _geom_bond_site_symmetry_2 
 _geom_bond_publ_flag 
Ga C1 0.531(4) 2_655 ? 
Ga C2 0.885(4) . ? 
Ga N1 1.757(6) 2_655 ? 
Ga N2 1.984(6) 2_655 ? 
Ga N1 1.985(6) . ? 
Ga N2 2.023(5) . ? 
Ga Ga 2.8710(13) 2_655 ? 
Ga H2 1.44(3) . ? 
N1 C1 1.367(8) . ? 
N1 C2 1.419(7) . ? 
N1 C31 1.463(3) . ? 
N1 C32 1.658(4) . ? 
N1 Ga 1.757(6) 2_655 ? 
N2 C31 1.278(4) . ? 
N2 C2 1.367(8) . ? 
N2 C32 1.462(3) . ? 
N2 C1 1.577(6) . ? 
N2 Ga 1.984(6) 2_655 ? 
C1 Ga 0.531(4) 2_655 ? 
C1 C2 1.380(6) 2_655 ? 
C1 H1 1.01(3) . ? 
C2 C1 1.380(6) 2_655 ? 
C2 H2 0.86(3) . ? 
C31 C6 1.523(5) . ? 
C31 C5 1.524(5) . ? 
C31 C4 1.536(9) . ? 
C4 H4A 0.9800 . ? 
C4 H4B 0.9800 . ? 
C4 H4C 0.9800 . ? 
C5 H5A 0.9800 . ? 
C5 H5B 0.9800 . ? 
C5 H5C 0.9800 . ? 
C6 H6A 0.9800 . ? 
C6 H6B 0.9800 . ? 
C6 H6C 0.9800 . ? 
C32 C8 1.523(5) . ? 
C32 C9 1.523(4) . ? 
C32 C7 1.536(9) . ? 
C7 H7A 0.9800 . ? 
C7 H7B 0.9800 . ? 
C7 H7C 0.9800 . ? 
C8 H8A 0.9800 . ? 
C8 H8B 0.9800 . ? 
C8 H8C 0.9800 . ? 
C9 H9A 0.9800 . ? 
C9 H9B 0.9800 . ? 
C9 H9C 0.9800 . ? 
K O4 2.7304(16) 2_566 ? 
K O4 2.7304(16) . ? 
K O3 2.7702(13) 2_566 ? 
K O3 2.7702(13) . ? 
K O1 2.7965(15) 2_566 ? 
K O1 2.7965(15) . ? 
K O2 2.8180(14) 2_566 ? 
K O2 2.8180(14) . ? 
O1 C12 1.417(2) . ? 
O1 C11 1.427(2) . ? 
O2 C14 1.421(2) . ? 
O2 C13 1.422(2) . ? 
O3 C15 1.421(2) . ? 
O3 C16 1.424(2) . ? 
O4 C44 1.420(3) . ? 
O4 C41 1.420(3) . ? 
C11 C16 1.491(3) 2_566 ? 
C11 H111 0.97(2) . ? 
C11 H112 0.94(2) . ? 
C12 C13 1.489(3) . ? 
C12 H121 0.96(2) . ? 
C12 H122 0.97(2) . ? 
C13 H131 0.98(2) . ? 
C13 H132 1.02(2) . ? 
C14 C15 1.490(3) . ? 
C14 H141 0.98(2) . ? 
C14 H142 0.94(2) . ? 
C15 H151 0.97(2) . ? 
C15 H152 1.00(2) . ? 
C16 C11 1.491(3) 2_566 ? 
C16 H161 0.98(2) . ? 
C16 H162 0.98(2) . ? 
C41 C42 1.499(3) . ? 
C41 H41A 0.9900 . ? 
C41 H41B 0.9900 . ? 
C42 C43' 1.435(8) . ? 
C42 C43 1.553(6) . ? 
C42 H42A 0.9900 . ? 
C42 H42B 0.9900 . ? 
C43 C44 1.471(5) . ? 
C43 H43A 0.9900 . ? 
C43 H43B 0.9900 . ? 
C43' C44 1.602(8) . ? 
C43' H43C 0.9900 . ? 
C43' H43D 0.9900 . ? 
C44 H44A 0.9900 . ? 
C44 H44B 0.9900 . ? 
 
loop_ 
 _geom_angle_atom_site_label_1 
 _geom_angle_atom_site_label_2 
 _geom_angle_atom_site_label_3 
 _geom_angle 
 _geom_angle_site_symmetry_1 
 _geom_angle_site_symmetry_3 
 _geom_angle_publ_flag 
C1 Ga C2 153.5(8) 2_655 . ? 
C1 Ga N1 36.4(7) 2_655 2_655 ? 
C2 Ga N1 119.4(2) . 2_655 ? 
C1 Ga N2 34.8(5) 2_655 2_655 ? 
C2 Ga N2 121.3(3) . 2_655 ? 
N1 Ga N2 2.2(5) 2_655 2_655 ? 
C1 Ga N1 115.7(7) 2_655 . ? 
C2 Ga N1 39.6(2) . . ? 
N1 Ga N1 79.97(10) 2_655 . ? 
N2 Ga N1 81.8(3) 2_655 . ? 
C1 Ga N2 122.1(6) 2_655 . ? 
C2 Ga N2 32.9(3) . . ? 
N1 Ga N2 86.6(3) 2_655 . ? 
N2 Ga N2 88.46(9) 2_655 . ? 
N1 Ga N2 6.7(3) . . ? 
C1 Ga Ga 78.9(6) 2_655 2_655 ? 
C2 Ga Ga 76.5(2) . 2_655 ? 
N1 Ga Ga 42.91(15) 2_655 2_655 ? 
N2 Ga Ga 44.78(17) 2_655 2_655 ? 
N1 Ga Ga 37.06(15) . 2_655 ? 
N2 Ga Ga 43.68(15) . 2_655 ? 
C1 Ga H2 165.8(15) 2_655 . ? 
C2 Ga H2 33.6(13) . . ? 
N1 Ga H2 152.8(14) 2_655 . ? 
N2 Ga H2 154.8(14) 2_655 . ? 
N1 Ga H2 73.2(14) . . ? 
N2 Ga H2 66.5(14) . . ? 
Ga Ga H2 110.1(14) 2_655 . ? 
C1 N1 C2 136.5(3) . . ? 
C1 N1 C31 116.4(6) . . ? 
C2 N1 C31 107.1(5) . . ? 
C1 N1 C32 119.6(7) . . ? 
C2 N1 C32 103.9(6) . . ? 
C31 N1 C32 4.7(4) . . ? 
C1 N1 Ga 13.3(2) . 2_655 ? 
C2 N1 Ga 123.3(2) . 2_655 ? 
C31 N1 Ga 129.6(5) . 2_655 ? 
C32 N1 Ga 132.6(6) . 2_655 ? 
C1 N1 Ga 113.1(3) . . ? 
C2 N1 Ga 23.39(18) . . ? 
C31 N1 Ga 130.4(5) . . ? 
C32 N1 Ga 127.3(6) . . ? 
Ga N1 Ga 100.03(10) 2_655 . ? 
C31 N2 C2 122.4(7) . . ? 
C31 N2 C32 6.0(6) . . ? 
C2 N2 C32 118.2(5) . . ? 
C31 N2 C1 114.4(7) . . ? 
C2 N2 C1 122.8(3) . . ? 
C32 N2 C1 118.9(5) . . ? 
C31 N2 Ga 125.4(7) . 2_655 ? 
C2 N2 Ga 112.1(2) . 2_655 ? 
C32 N2 Ga 129.7(5) . 2_655 ? 
C1 N2 Ga 11.1(2) . 2_655 ? 
C31 N2 Ga 142.7(7) . . ? 
C2 N2 Ga 20.57(18) . . ? 
C32 N2 Ga 138.8(5) . . ? 
C1 N2 Ga 102.3(2) . . ? 
Ga N2 Ga 91.54(9) 2_655 . ? 
Ga C1 N1 130.3(9) 2_655 . ? 
Ga C1 C2 16.6(5) 2_655 2_655 ? 
N1 C1 C2 115.5(5) . 2_655 ? 
Ga C1 N2 134.1(7) 2_655 . ? 
N1 C1 N2 4.3(4) . . ? 
C2 C1 N2 119.6(3) 2_655 . ? 
Ga C1 H1 106(2) 2_655 . ? 
N1 C1 H1 123(2) . . ? 
C2 C1 H1 121.9(19) 2_655 . ? 
N2 C1 H1 118(2) . . ? 
Ga C2 N2 126.6(4) . . ? 
Ga C2 C1 9.9(3) . 2_655 ? 
N2 C2 C1 117.5(3) . 2_655 ? 
Ga C2 N1 117.1(3) . . ? 
N2 C2 N1 9.5(3) . . ? 
C1 C2 N1 108.1(3) 2_655 . ? 
Ga C2 H2 112(2) . . ? 
N2 C2 H2 122(2) . . ? 
C1 C2 H2 121(2) 2_655 . ? 
N1 C2 H2 131(2) . . ? 
N2 C31 N1 6.3(6) . . ? 
N2 C31 C6 113.7(6) . . ? 
N1 C31 C6 112.3(5) . . ? 
N2 C31 C5 116.1(6) . . ? 
N1 C31 C5 111.8(5) . . ? 
C6 C31 C5 108.7(5) . . ? 
N2 C31 C4 102.3(7) . . ? 
N1 C31 C4 108.4(5) . . ? 
C6 C31 C4 108.3(4) . . ? 
C5 C31 C4 107.1(4) . . ? 
C31 C4 H4A 109.5 . . ? 
C31 C4 H4B 109.5 . . ? 
H4A C4 H4B 109.5 . . ? 
C31 C4 H4C 109.5 . . ? 
H4A C4 H4C 109.5 . . ? 
H4B C4 H4C 109.5 . . ? 
C31 C5 H5A 109.5 . . ? 
C31 C5 H5B 109.5 . . ? 
H5A C5 H5B 109.5 . . ? 
C31 C5 H5C 109.5 . . ? 
H5A C5 H5C 109.5 . . ? 
H5B C5 H5C 109.5 . . ? 
C31 C6 H6A 109.5 . . ? 
C31 C6 H6B 109.5 . . ? 
H6A C6 H6B 109.5 . . ? 
C31 C6 H6C 109.5 . . ? 
H6A C6 H6C 109.5 . . ? 
H6B C6 H6C 109.5 . . ? 
N2 C32 C8 111.8(5) . . ? 
N2 C32 C9 110.8(6) . . ? 
C8 C32 C9 109.2(5) . . ? 
N2 C32 C7 108.7(5) . . ? 
C8 C32 C7 108.4(4) . . ? 
C9 C32 C7 107.8(4) . . ? 
N2 C32 N1 5.0(5) . . ? 
C8 C32 N1 115.4(5) . . ? 
C9 C32 N1 111.6(5) . . ? 
C7 C32 N1 104.0(6) . . ? 
C32 C7 H7A 109.5 . . ? 
C32 C7 H7B 109.5 . . ? 
H7A C7 H7B 109.5 . . ? 
C32 C7 H7C 109.5 . . ? 
H7A C7 H7C 109.5 . . ? 
H7B C7 H7C 109.5 . . ? 
C32 C8 H8A 109.5 . . ? 
C32 C8 H8B 109.5 . . ? 
H8A C8 H8B 109.5 . . ? 
C32 C8 H8C 109.5 . . ? 
H8A C8 H8C 109.5 . . ? 
H8B C8 H8C 109.5 . . ? 
C32 C9 H9A 109.5 . . ? 
C32 C9 H9B 109.5 . . ? 
H9A C9 H9B 109.5 . . ? 
C32 C9 H9C 109.5 . . ? 
H9A C9 H9C 109.5 . . ? 
H9B C9 H9C 109.5 . . ? 
O4 K O4 180.0 2_566 . ? 
O4 K O3 90.24(5) 2_566 2_566 ? 
O4 K O3 89.76(5) . 2_566 ? 
O4 K O3 89.76(5) 2_566 . ? 
O4 K O3 90.24(5) . . ? 
O3 K O3 180.0 2_566 . ? 
O4 K O1 96.06(5) 2_566 2_566 ? 
O4 K O1 83.94(5) . 2_566 ? 
O3 K O1 119.77(4) 2_566 2_566 ? 
O3 K O1 60.23(4) . 2_566 ? 
O4 K O1 83.94(5) 2_566 . ? 
O4 K O1 96.06(5) . . ? 
O3 K O1 60.23(4) 2_566 . ? 
O3 K O1 119.77(4) . . ? 
O1 K O1 180.00(5) 2_566 . ? 
O4 K O2 84.55(5) 2_566 2_566 ? 
O4 K O2 95.45(5) . 2_566 ? 
O3 K O2 61.19(4) 2_566 2_566 ? 
O3 K O2 118.81(4) . 2_566 ? 
O1 K O2 59.98(4) 2_566 2_566 ? 
O1 K O2 120.02(4) . 2_566 ? 
O4 K O2 95.45(5) 2_566 . ? 
O4 K O2 84.55(5) . . ? 
O3 K O2 118.81(4) 2_566 . ? 
O3 K O2 61.19(4) . . ? 
O1 K O2 120.02(4) 2_566 . ? 
O1 K O2 59.98(4) . . ? 
O2 K O2 180.0 2_566 . ? 
C12 O1 C11 112.58(15) . . ? 
C12 O1 K 115.31(10) . . ? 
C11 O1 K 115.73(11) . . ? 
C14 O2 C13 112.11(15) . . ? 
C14 O2 K 110.77(11) . . ? 
C13 O2 K 114.39(10) . . ? 
C15 O3 C16 112.39(15) . . ? 
C15 O3 K 114.79(11) . . ? 
C16 O3 K 114.88(11) . . ? 
C44 O4 C41 109.15(17) . . ? 
C44 O4 K 121.05(14) . . ? 
C41 O4 K 123.29(14) . . ? 
O1 C11 C16 108.45(17) . 2_566 ? 
O1 C11 H111 111.9(13) . . ? 
C16 C11 H111 108.3(13) 2_566 . ? 
O1 C11 H112 108.3(13) . . ? 
C16 C11 H112 111.0(14) 2_566 . ? 
H111 C11 H112 108.9(18) . . ? 
O1 C12 C13 108.56(16) . . ? 
O1 C12 H121 110.7(13) . . ? 
C13 C12 H121 110.1(13) . . ? 
O1 C12 H122 110.7(12) . . ? 
C13 C12 H122 109.5(12) . . ? 
H121 C12 H122 107.2(17) . . ? 
O2 C13 C12 108.96(15) . . ? 
O2 C13 H131 109.0(12) . . ? 
C12 C13 H131 109.7(11) . . ? 
O2 C13 H132 111.4(12) . . ? 
C12 C13 H132 111.8(12) . . ? 
H131 C13 H132 105.9(16) . . ? 
O2 C14 C15 108.73(17) . . ? 
O2 C14 H141 108.9(12) . . ? 
C15 C14 H141 111.1(12) . . ? 
O2 C14 H142 110.0(13) . . ? 
C15 C14 H142 111.4(14) . . ? 
H141 C14 H142 106.7(17) . . ? 
O3 C15 C14 108.88(16) . . ? 
O3 C15 H151 109.6(13) . . ? 
C14 C15 H151 109.5(13) . . ? 
O3 C15 H152 109.9(12) . . ? 
C14 C15 H152 110.5(12) . . ? 
H151 C15 H152 108.5(17) . . ? 
O3 C16 C11 108.60(17) . 2_566 ? 
O3 C16 H161 108.7(12) . . ? 
C11 C16 H161 109.7(13) 2_566 . ? 
O3 C16 H162 111.8(13) . . ? 
C11 C16 H162 108.0(13) 2_566 . ? 
H161 C16 H162 110.0(18) . . ? 
O4 C41 C42 106.29(19) . . ? 
O4 C41 H41A 110.5 . . ? 
C42 C41 H41A 110.5 . . ? 
O4 C41 H41B 110.5 . . ? 
C42 C41 H41B 110.5 . . ? 
H41A C41 H41B 108.7 . . ? 
C43' C42 C41 110.2(4) . . ? 
C43' C42 C43 33.1(3) . . ? 
C41 C42 C43 97.8(3) . . ? 
C43' C42 H42A 128.2 . . ? 
C41 C42 H42A 112.2 . . ? 
C43 C42 H42A 112.2 . . ? 
C43' C42 H42B 79.2 . . ? 
C41 C42 H42B 112.2 . . ? 
C43 C42 H42B 112.2 . . ? 
H42A C42 H42B 109.8 . . ? 
C44 C43 C42 103.0(3) . . ? 
C44 C43 H43A 111.2 . . ? 
C42 C43 H43A 111.2 . . ? 
C44 C43 H43B 111.2 . . ? 
C42 C43 H43B 111.2 . . ? 
H43A C43 H43B 109.1 . . ? 
C42 C43' C44 102.3(5) . . ? 
C42 C43' H43C 111.3 . . ? 
C44 C43' H43C 111.3 . . ? 
C42 C43' H43D 111.3 . . ? 
C44 C43' H43D 111.3 . . ? 
H43C C43' H43D 109.2 . . ? 
O4 C44 C43 106.1(3) . . ? 
O4 C44 C43' 104.9(3) . . ? 
C43 C44 C43' 32.1(3) . . ? 
O4 C44 H44A 110.5 . . ? 
C43 C44 H44A 110.5 . . ? 
C43' C44 H44A 81.7 . . ? 
O4 C44 H44B 110.5 . . ? 
C43 C44 H44B 110.5 . . ? 
C43' C44 H44B 135.8 . . ? 
H44A C44 H44B 108.7 . . ? 
 
_diffrn_measured_fraction_theta_max    0.837 
_diffrn_reflns_theta_full              28.99 
_diffrn_measured_fraction_theta_full   0.837 
_refine_diff_density_max    0.272 
_refine_diff_density_min   -0.421 
_refine_diff_density_rms    0.047 
